# Supplementary material for: Severe COVID-19 in pregnancy has a distinct serum profile, including greater complement activation and dysregulation of serum lipids
Source: PubMed Central journal article supplement (PMC9668183; doi:10.1371/journal.pone.0276766), 2022-11-16

log10 peak area (intensity)

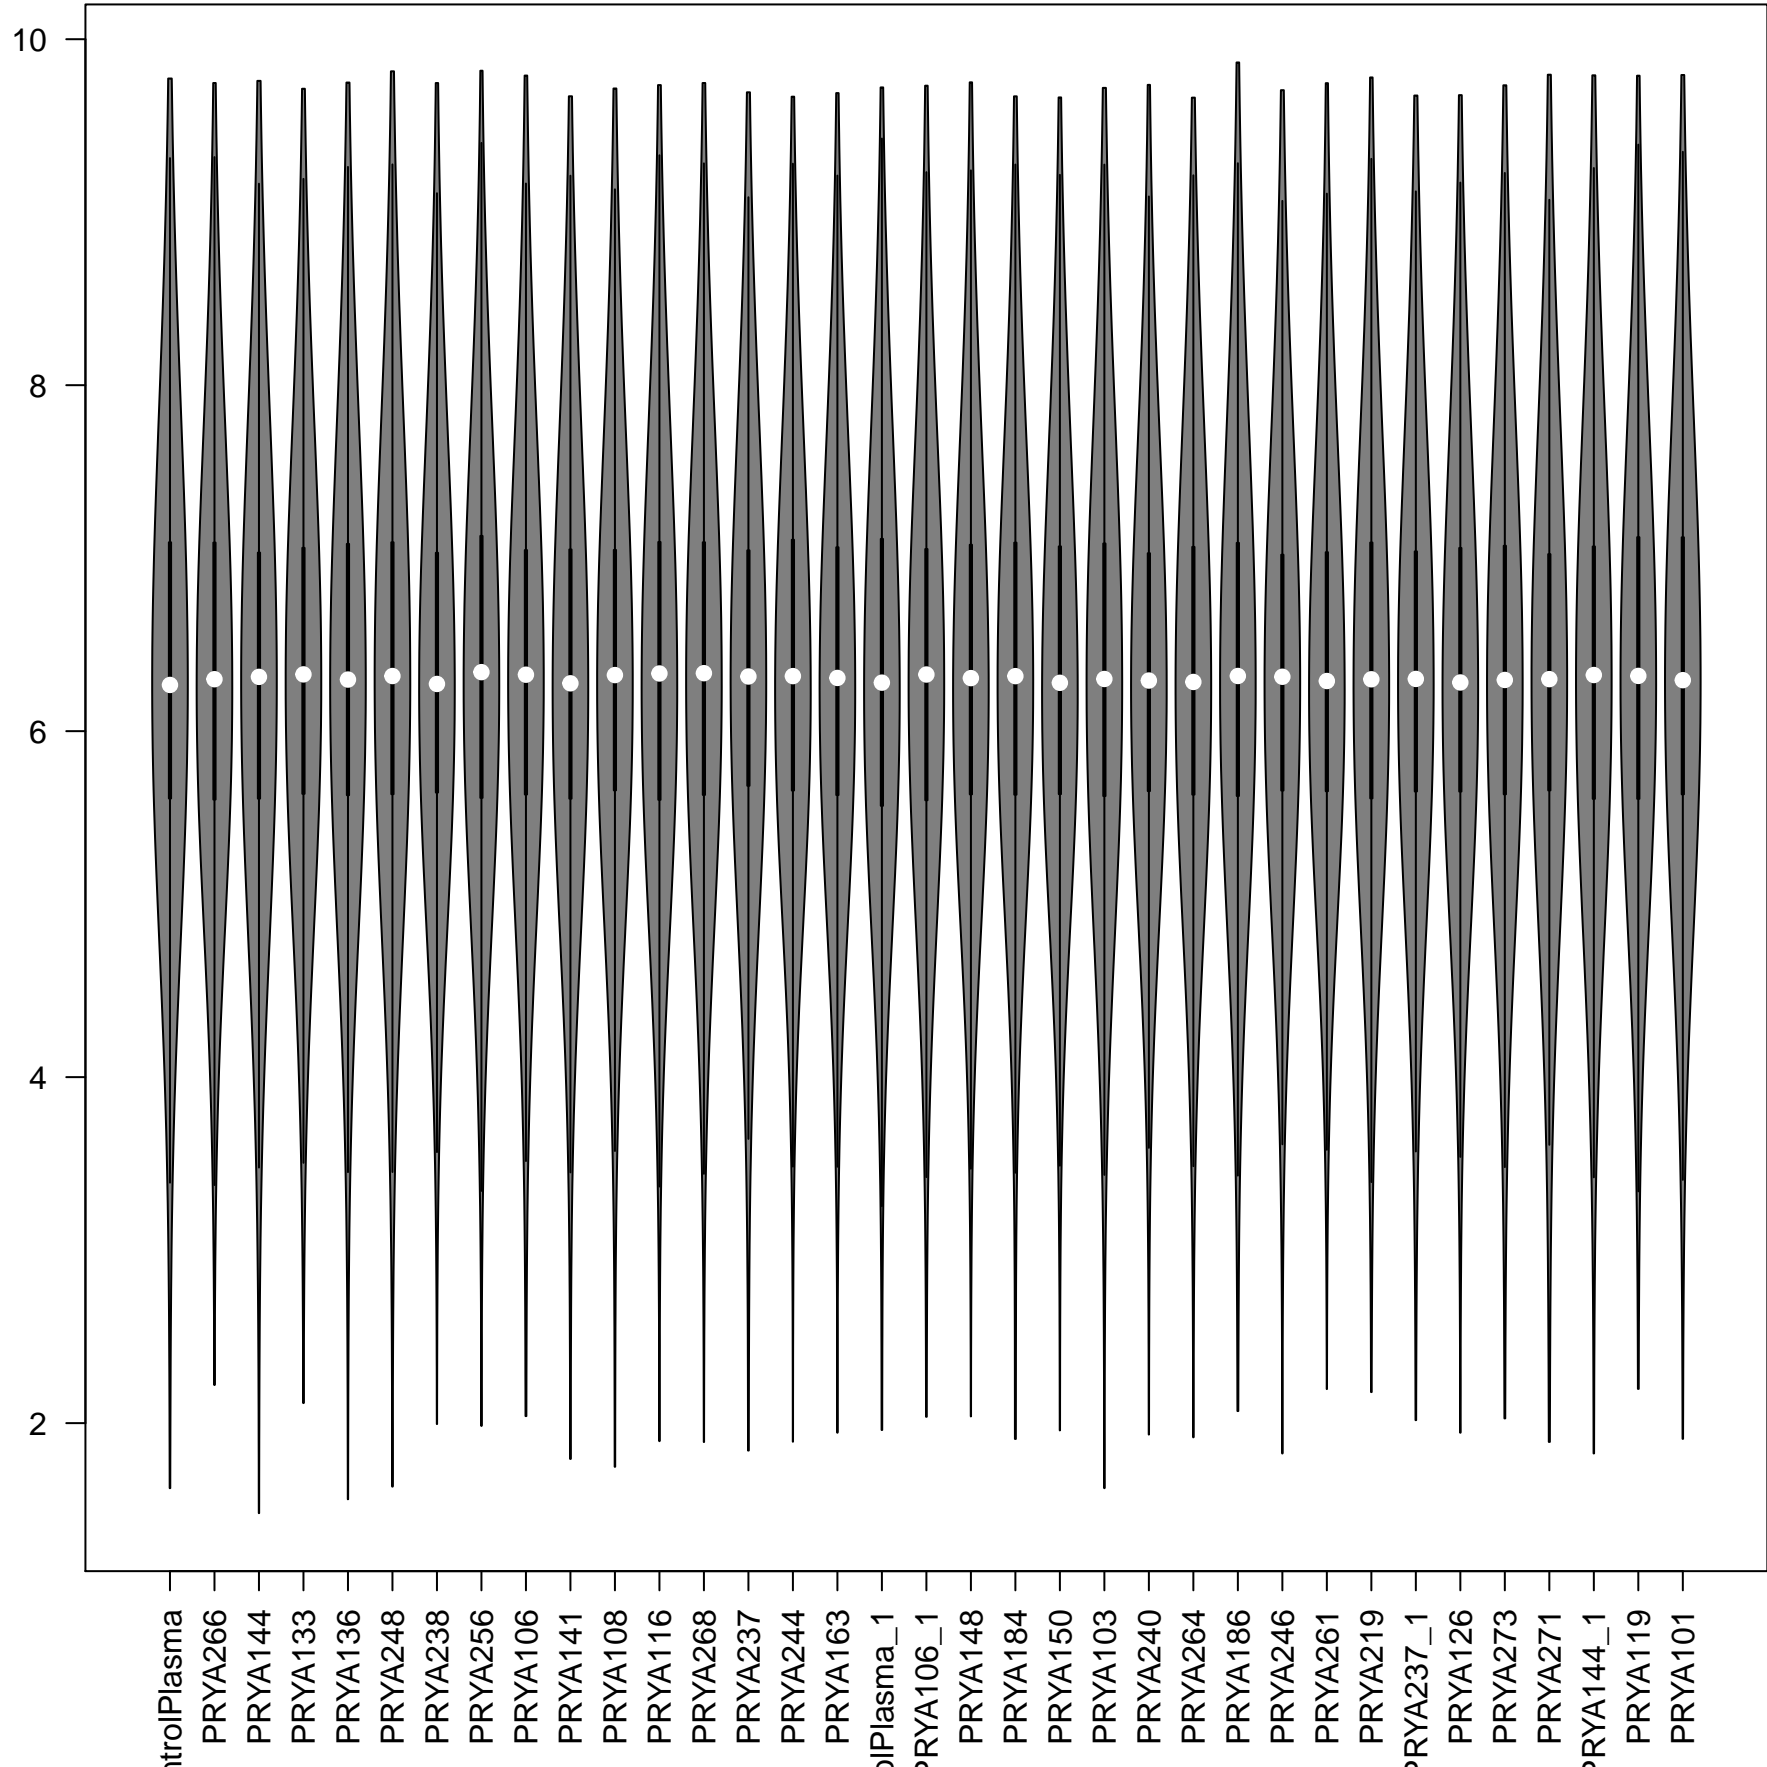

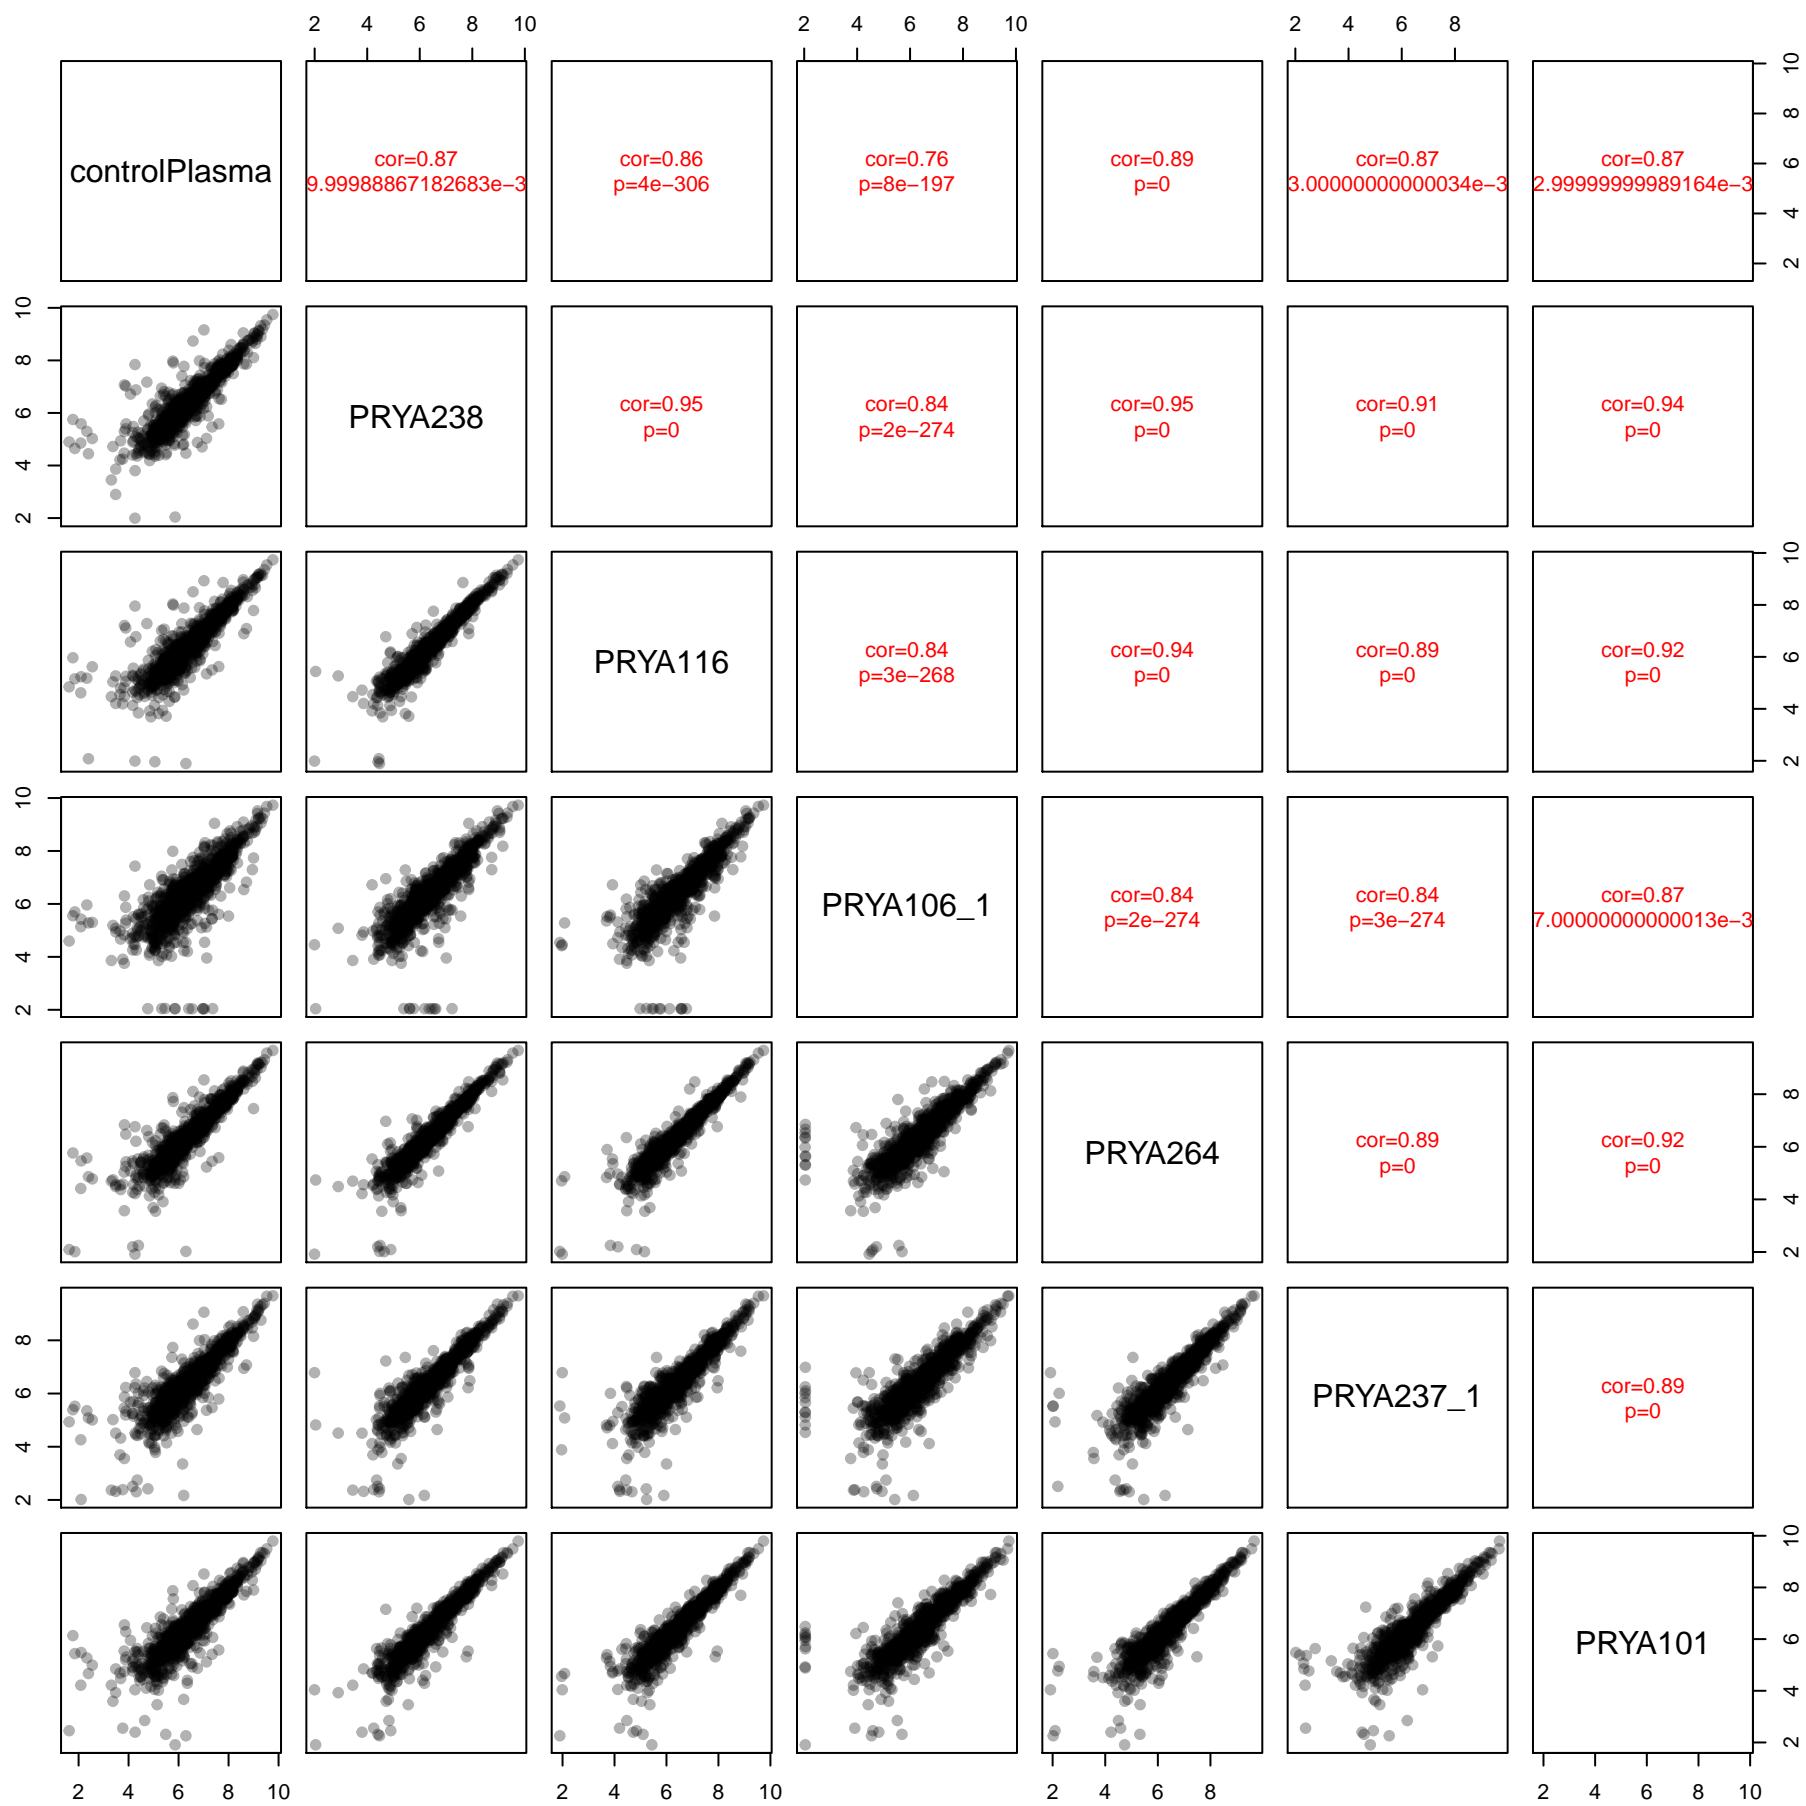

# Cluster Dendrogram

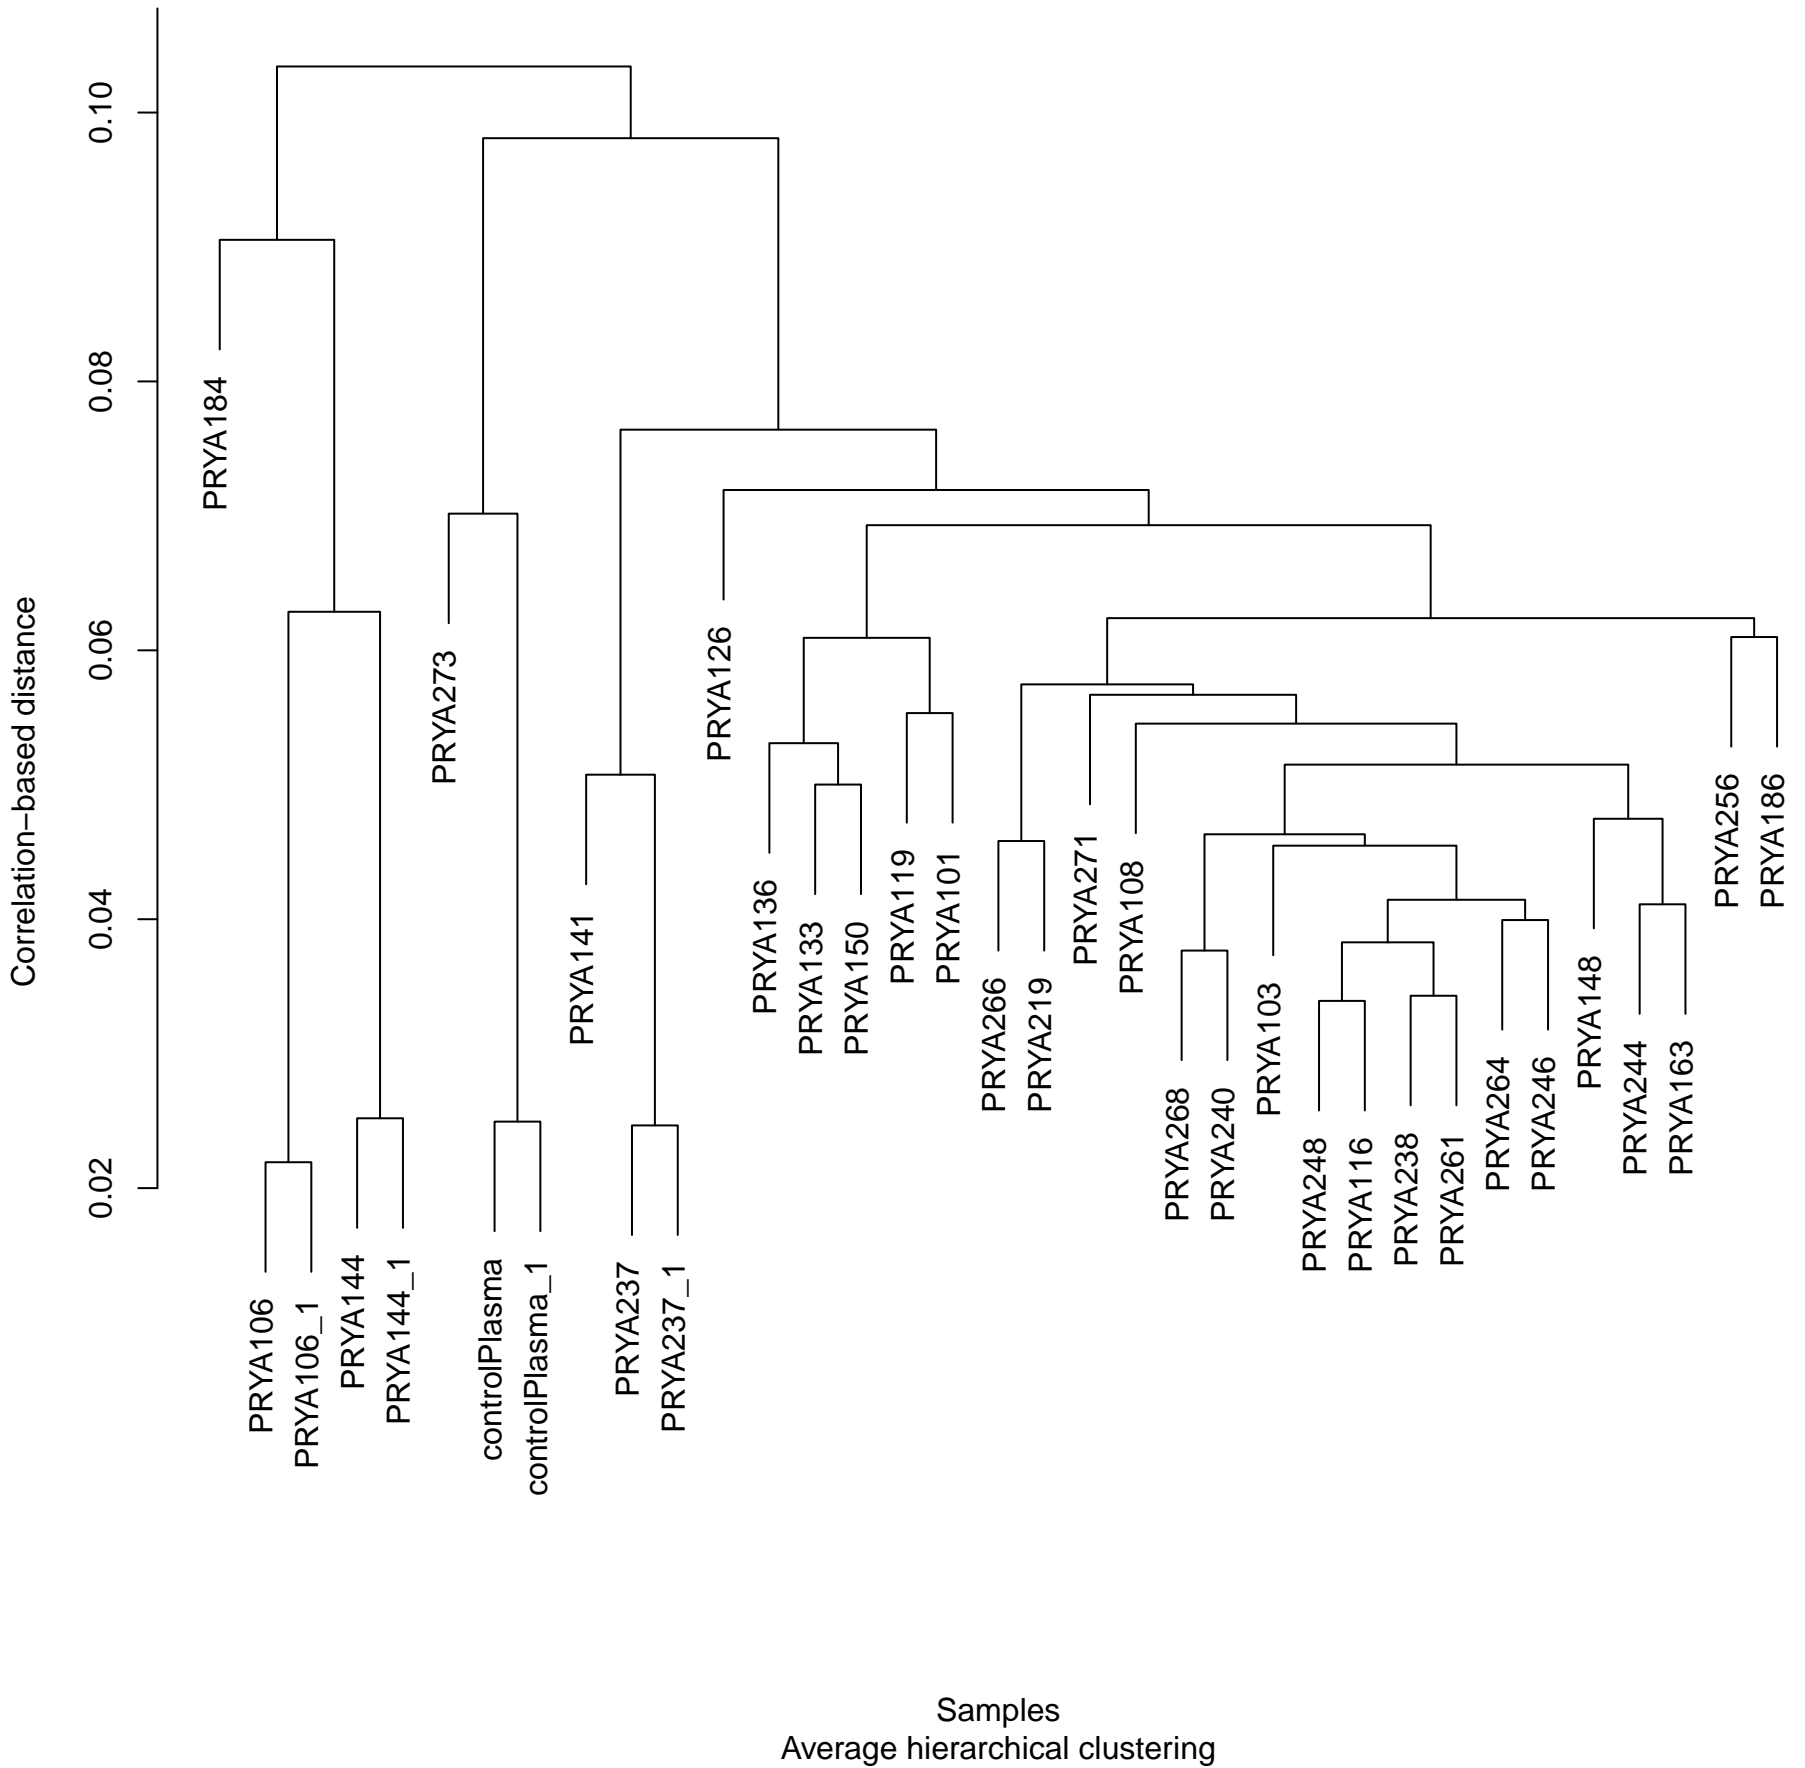

Color Key  
and Histogram

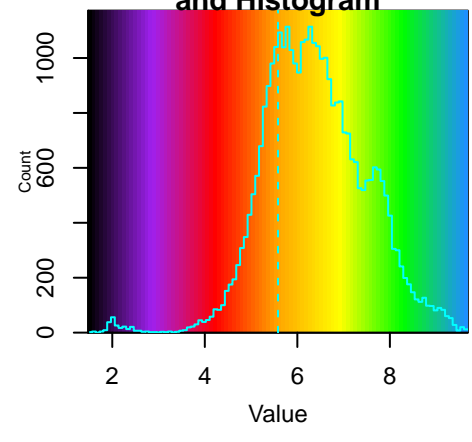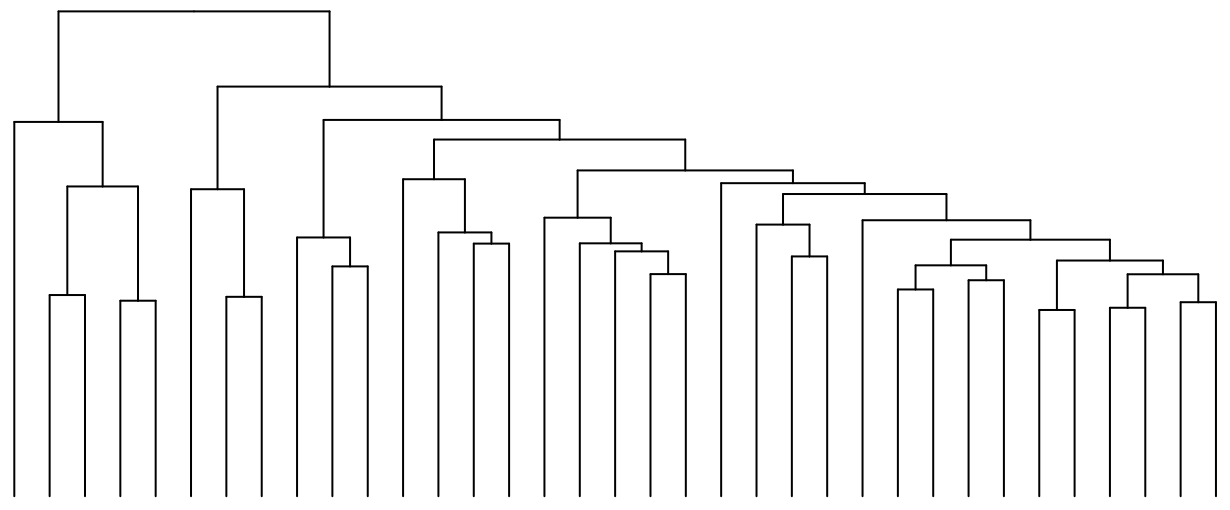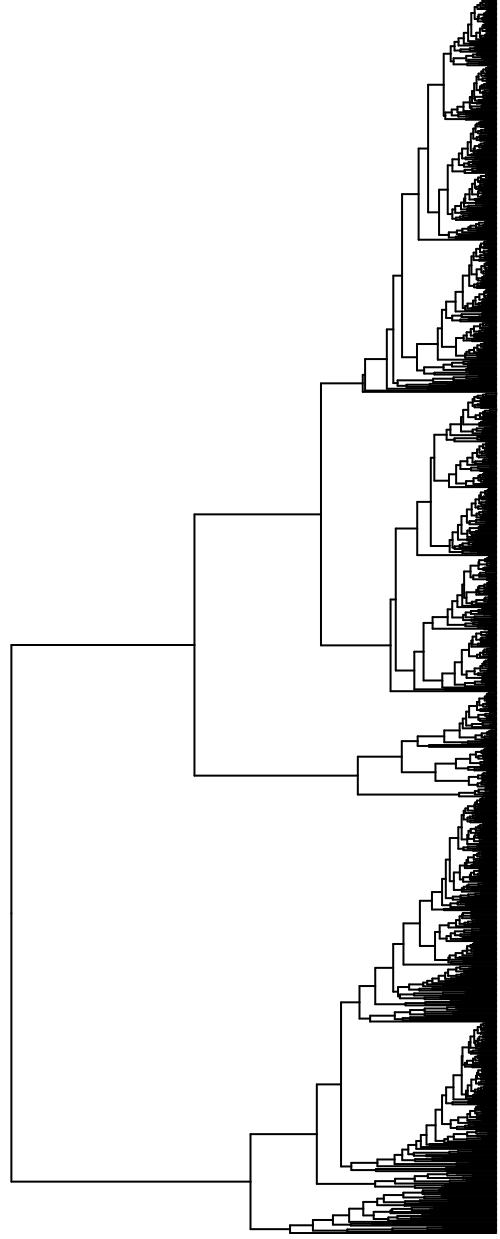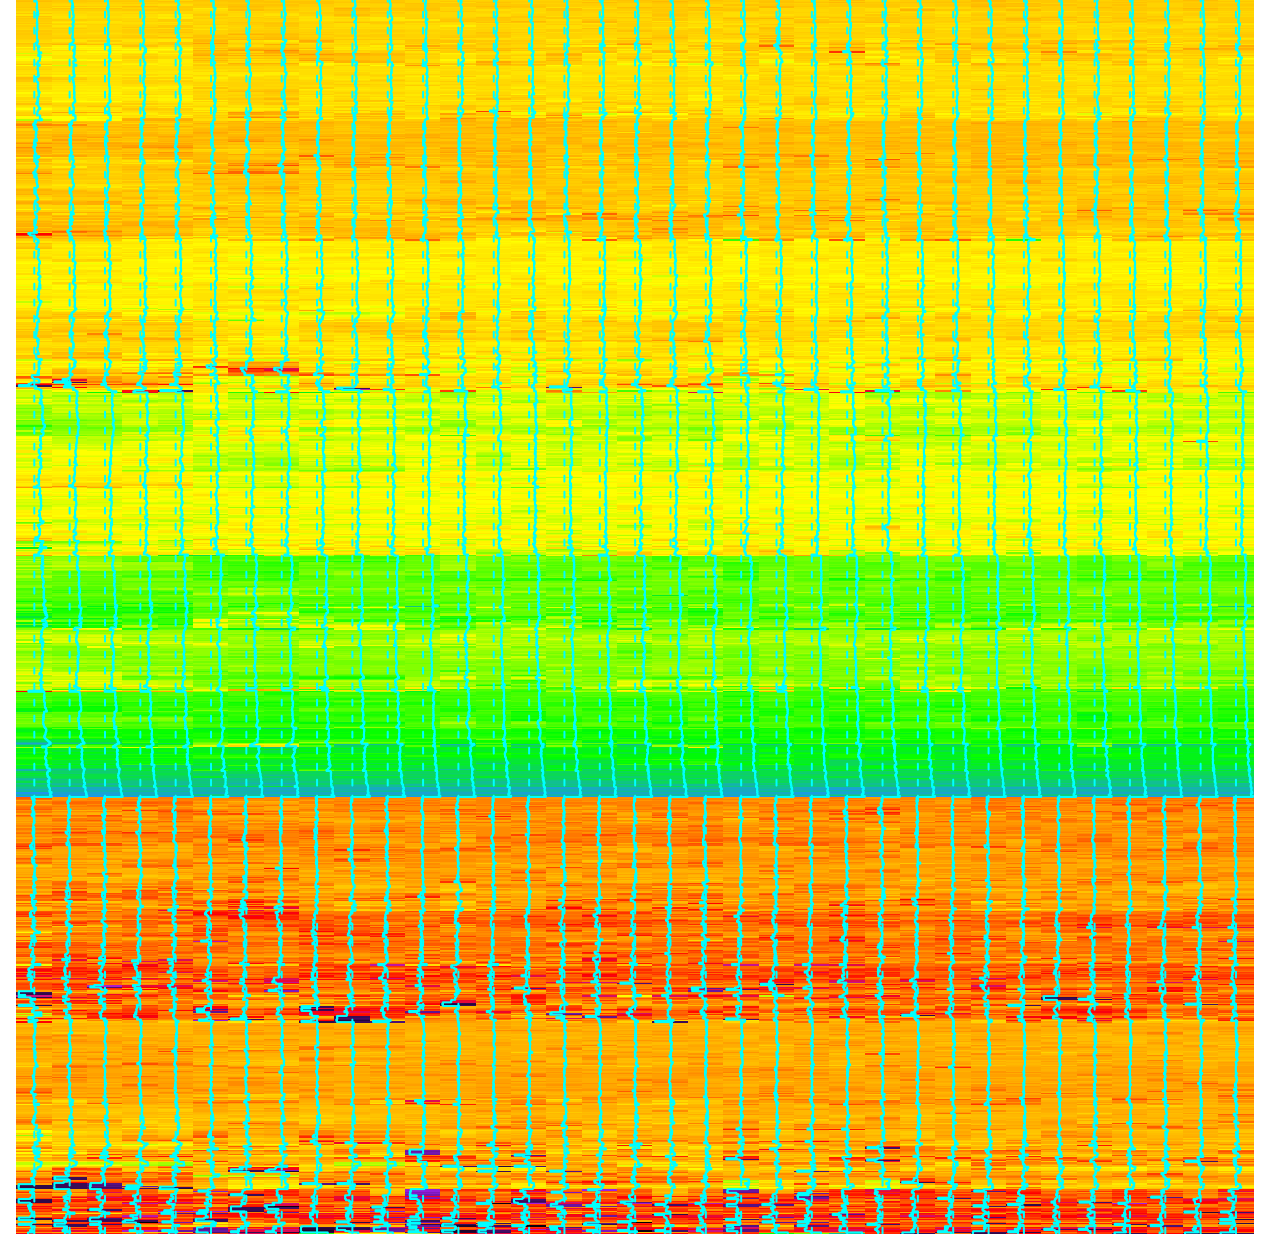

PRYA184  
PRYA106\_1  
PRYA106  
PRYA144  
PRYA144\_1  
PRYA273  
PRYA1Plasma\_1  
controlPlasma  
PRYA141  
PRYA237  
PRYA237\_1  
PRYA271  
PRYA108  
PRYA103  
PRYA248  
PRYA119  
PRYA101  
PRYA136  
PRYA150  
PRYA133  
PRYA186  
PRYA126  
PRYA219  
PRYA266  
PRYA256  
PRYA163  
PRYA148  
PRYA264  
PRYA244  
PRYA240  
PRYA268  
PRYA238  
PRYA261  
PRYA246  
PRYA116

604  
676  
430  
770  
988  
738  
287  
829  
407  
861  
290  
274  
61  
474  
947  
49  
219  
855  
26  
273  
191  
11  
322  
996  
125  
845  
506  
946  
165  
517  
353  
18  
376  
151  
765  
121  
809  
994  
495  
660  
744  
648  
606  
148  
257  
150  
584  
97  
930  
481  
452  
838  
889  
451  
304  
574  
966  
953  
493  
220  
832  
972  
743  
347  
43  
960  
982  
209  
46  
224  
587  
105  
761  
827  
216  
927  
878  
515  
538  
688  
476  
699  
778  
583  
168  
133  
416  
857  
634  
421  
935  
830  
572  
938  
531  
16  
803  
166  
459  
42

# PCA Variance Explained

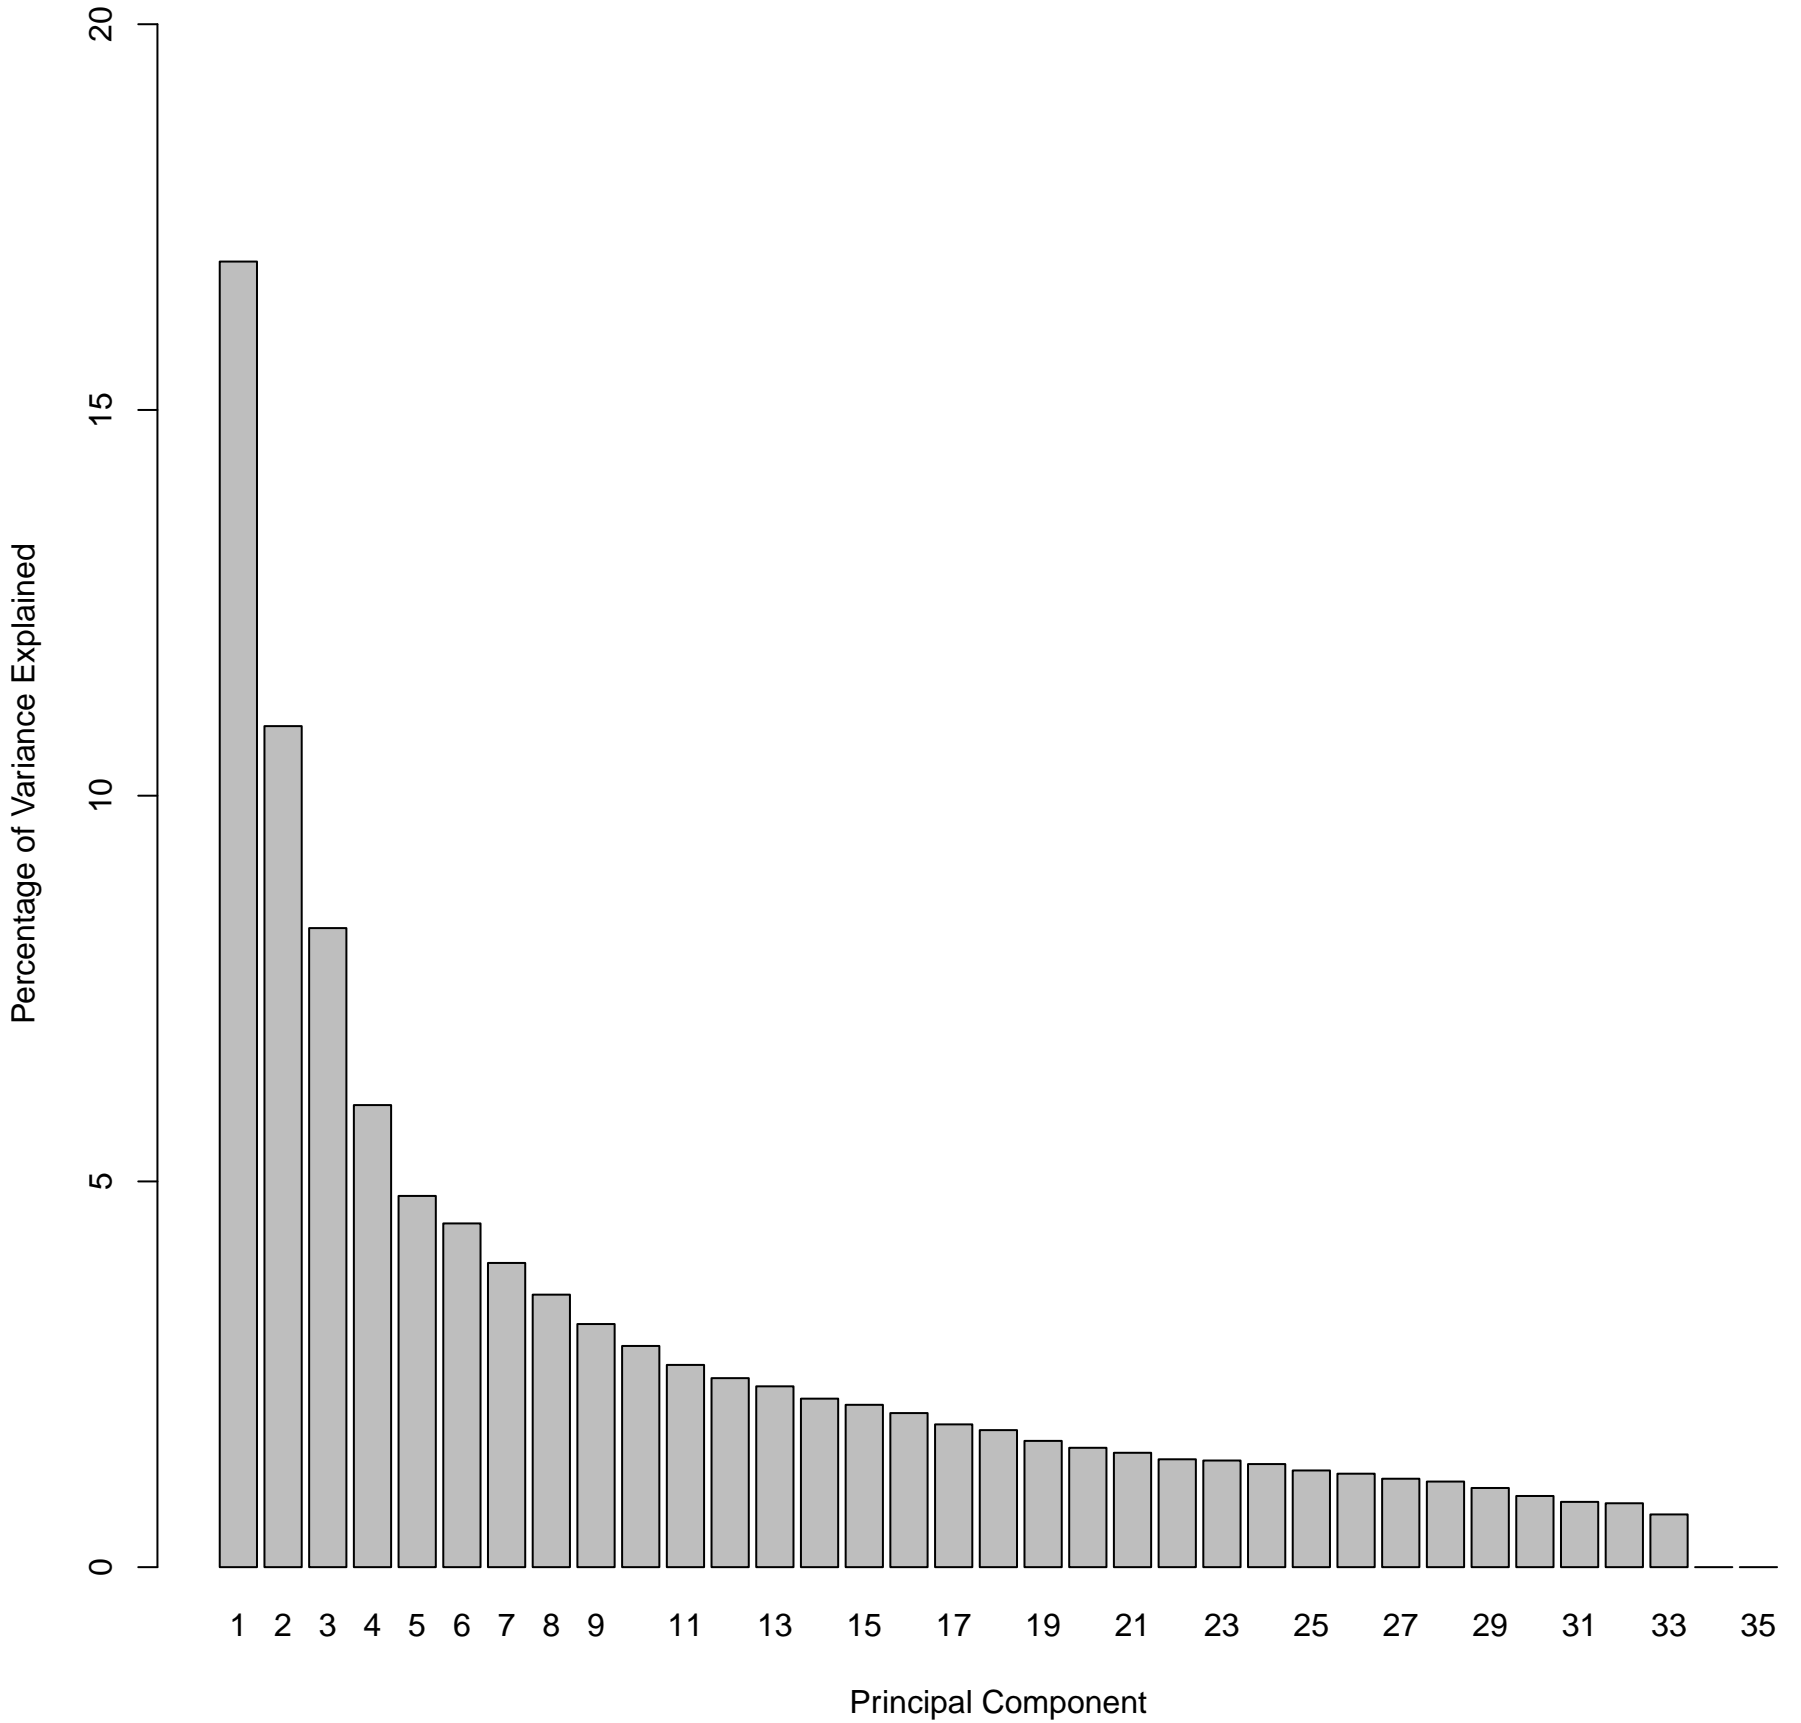

# PCA plot

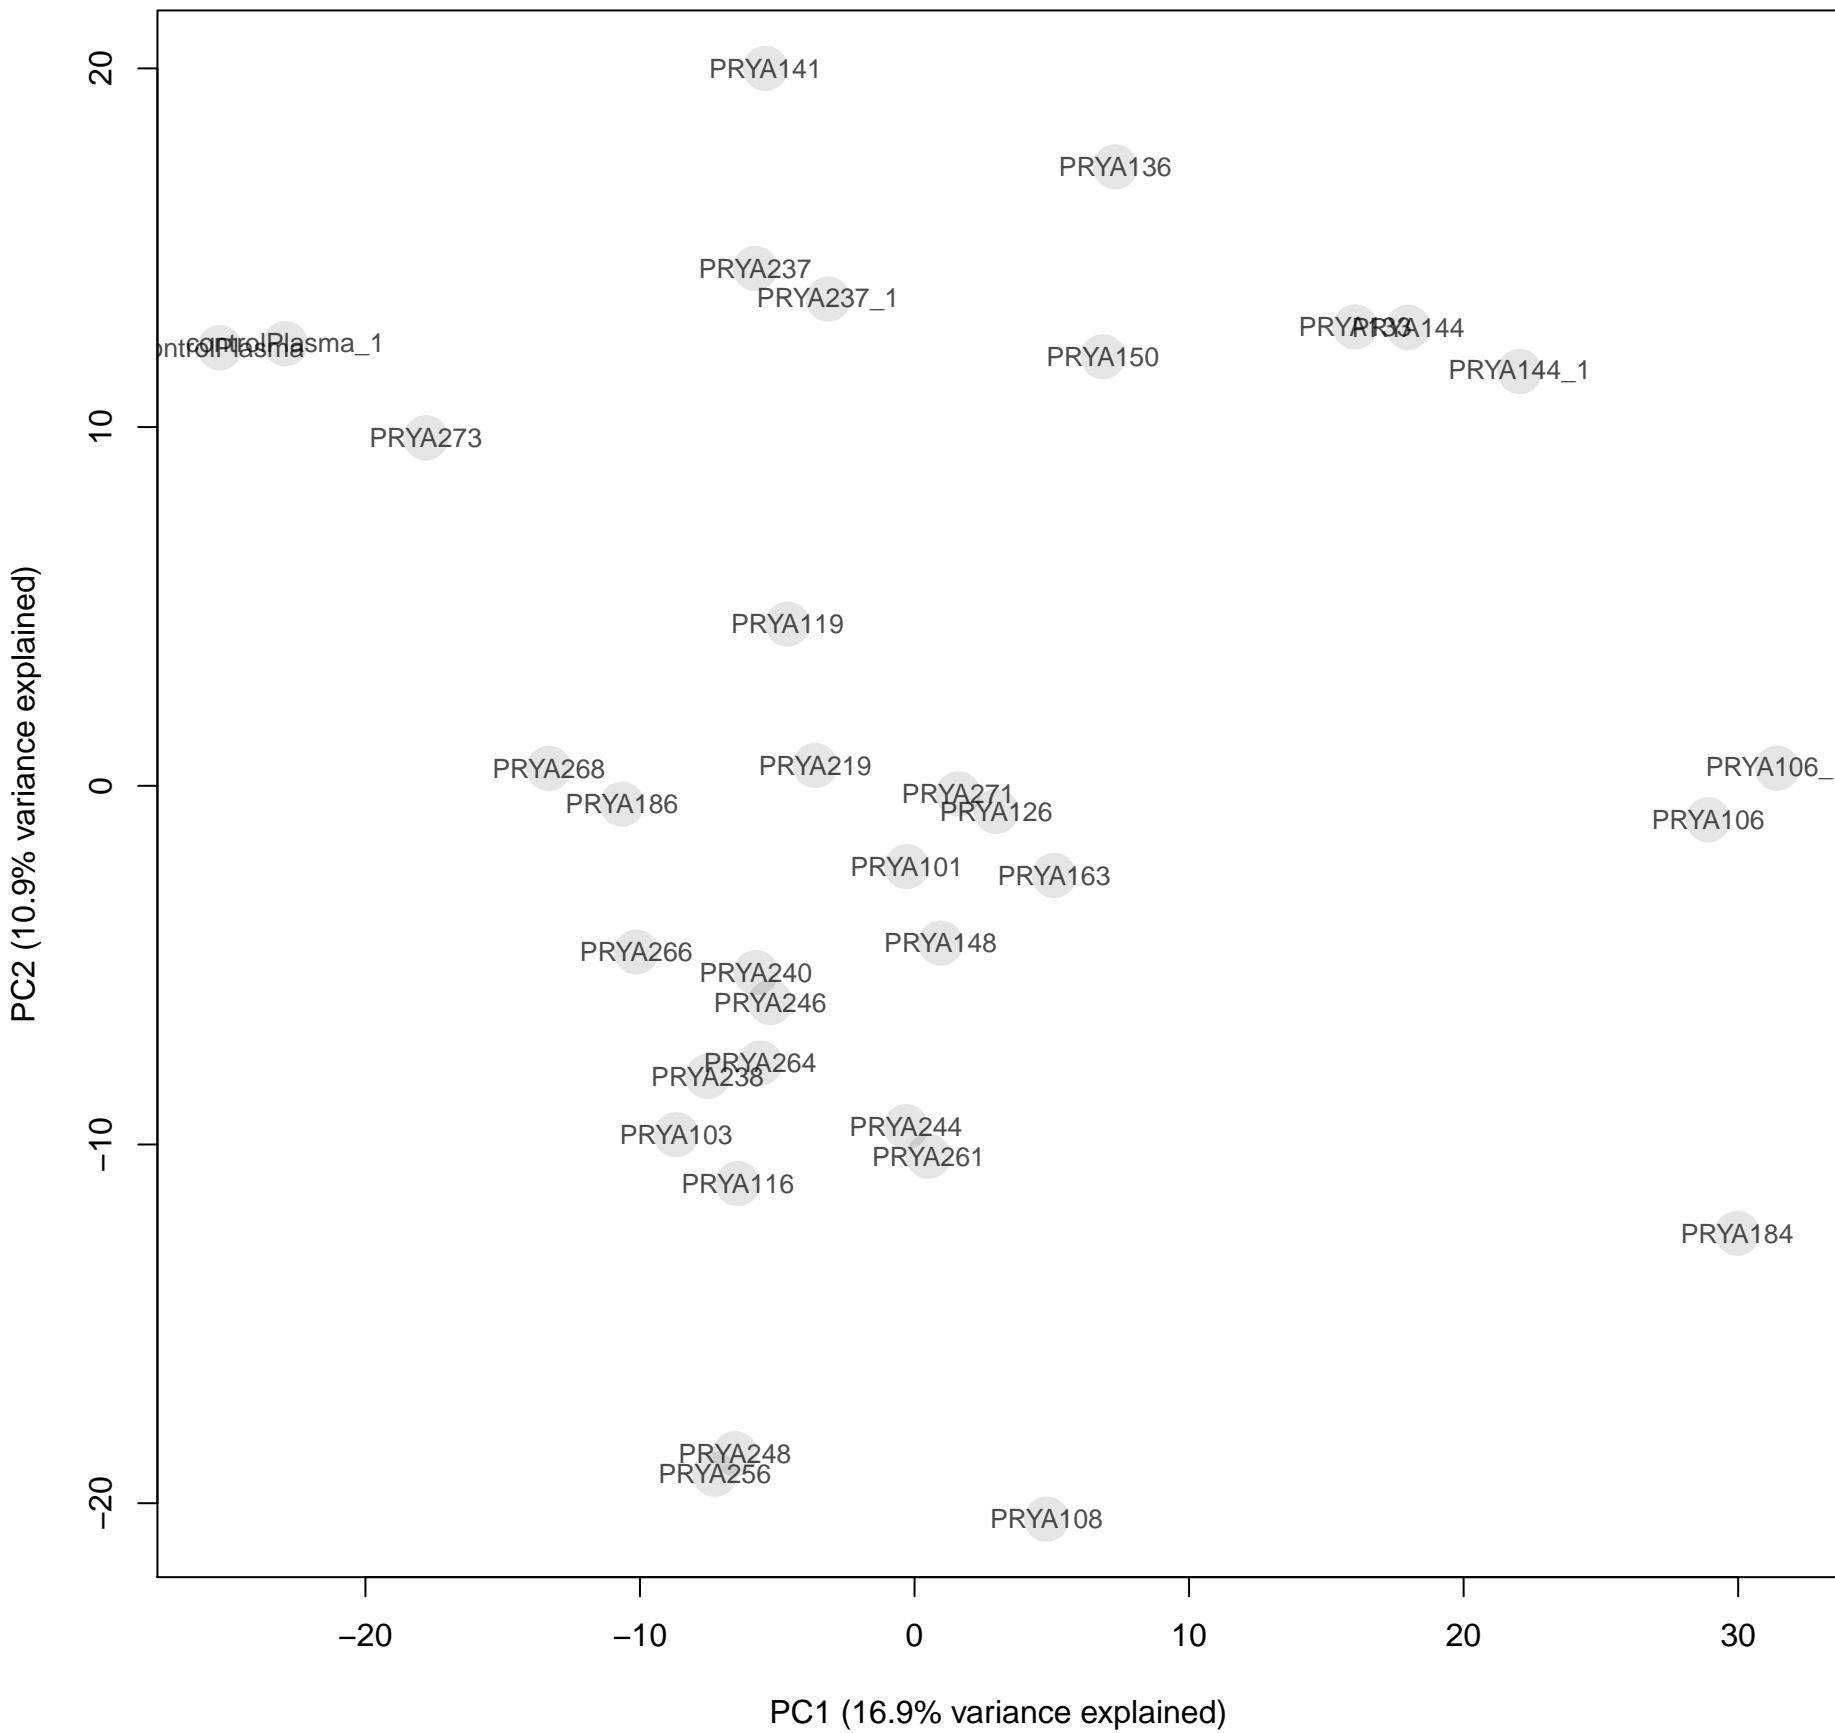

# Precision of Peak Areas

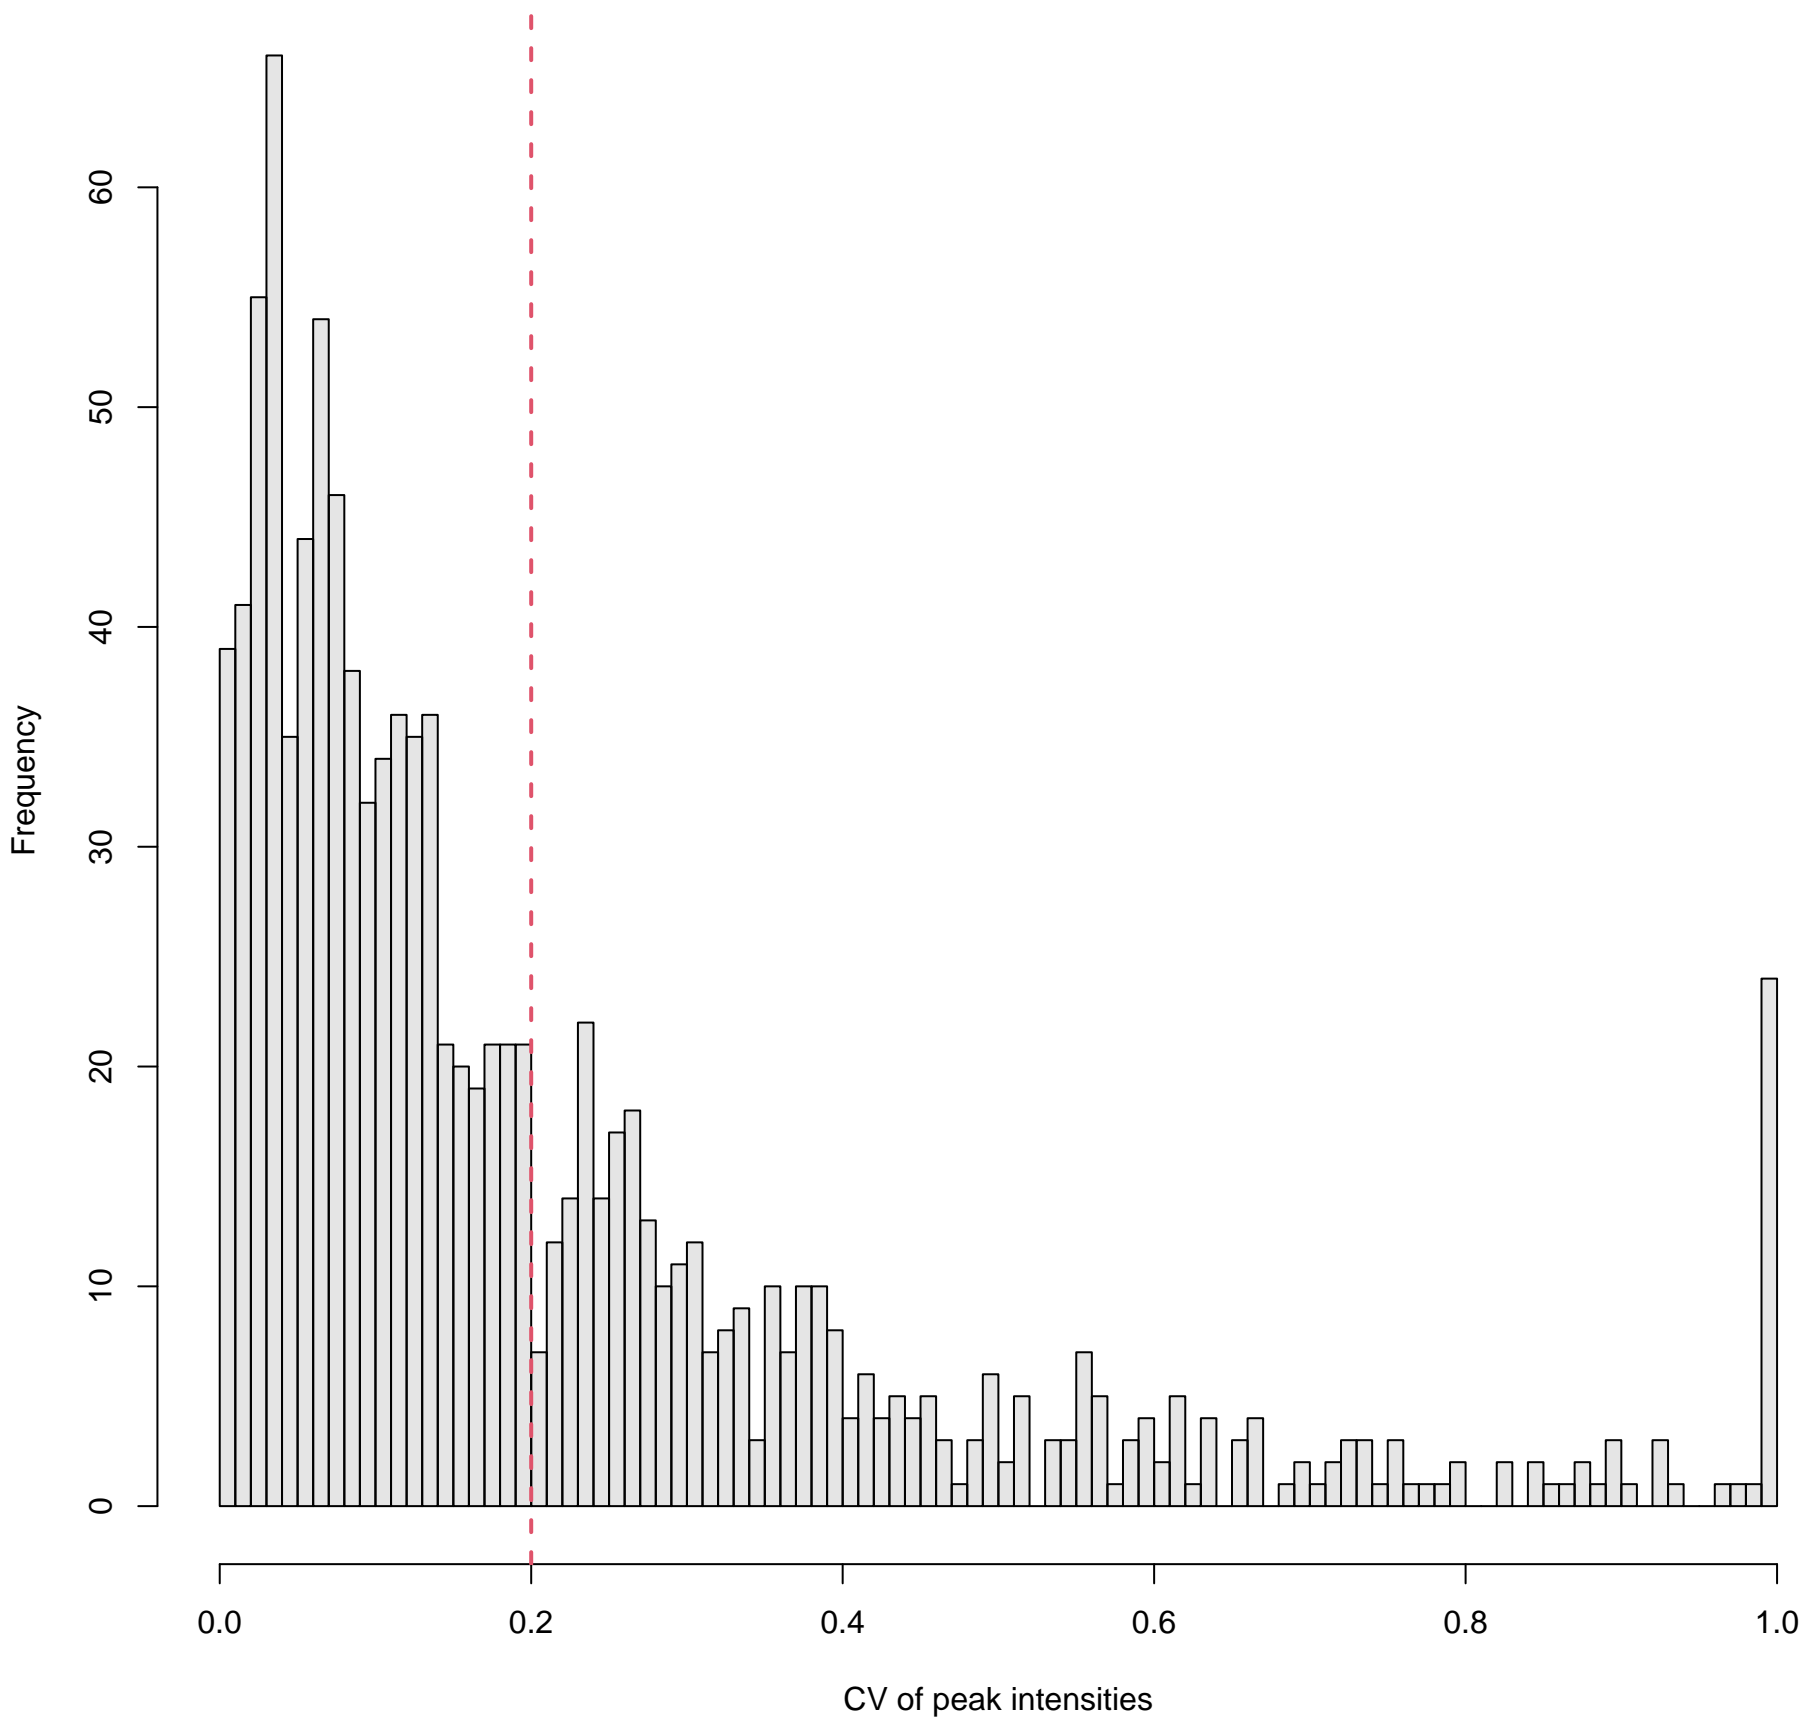

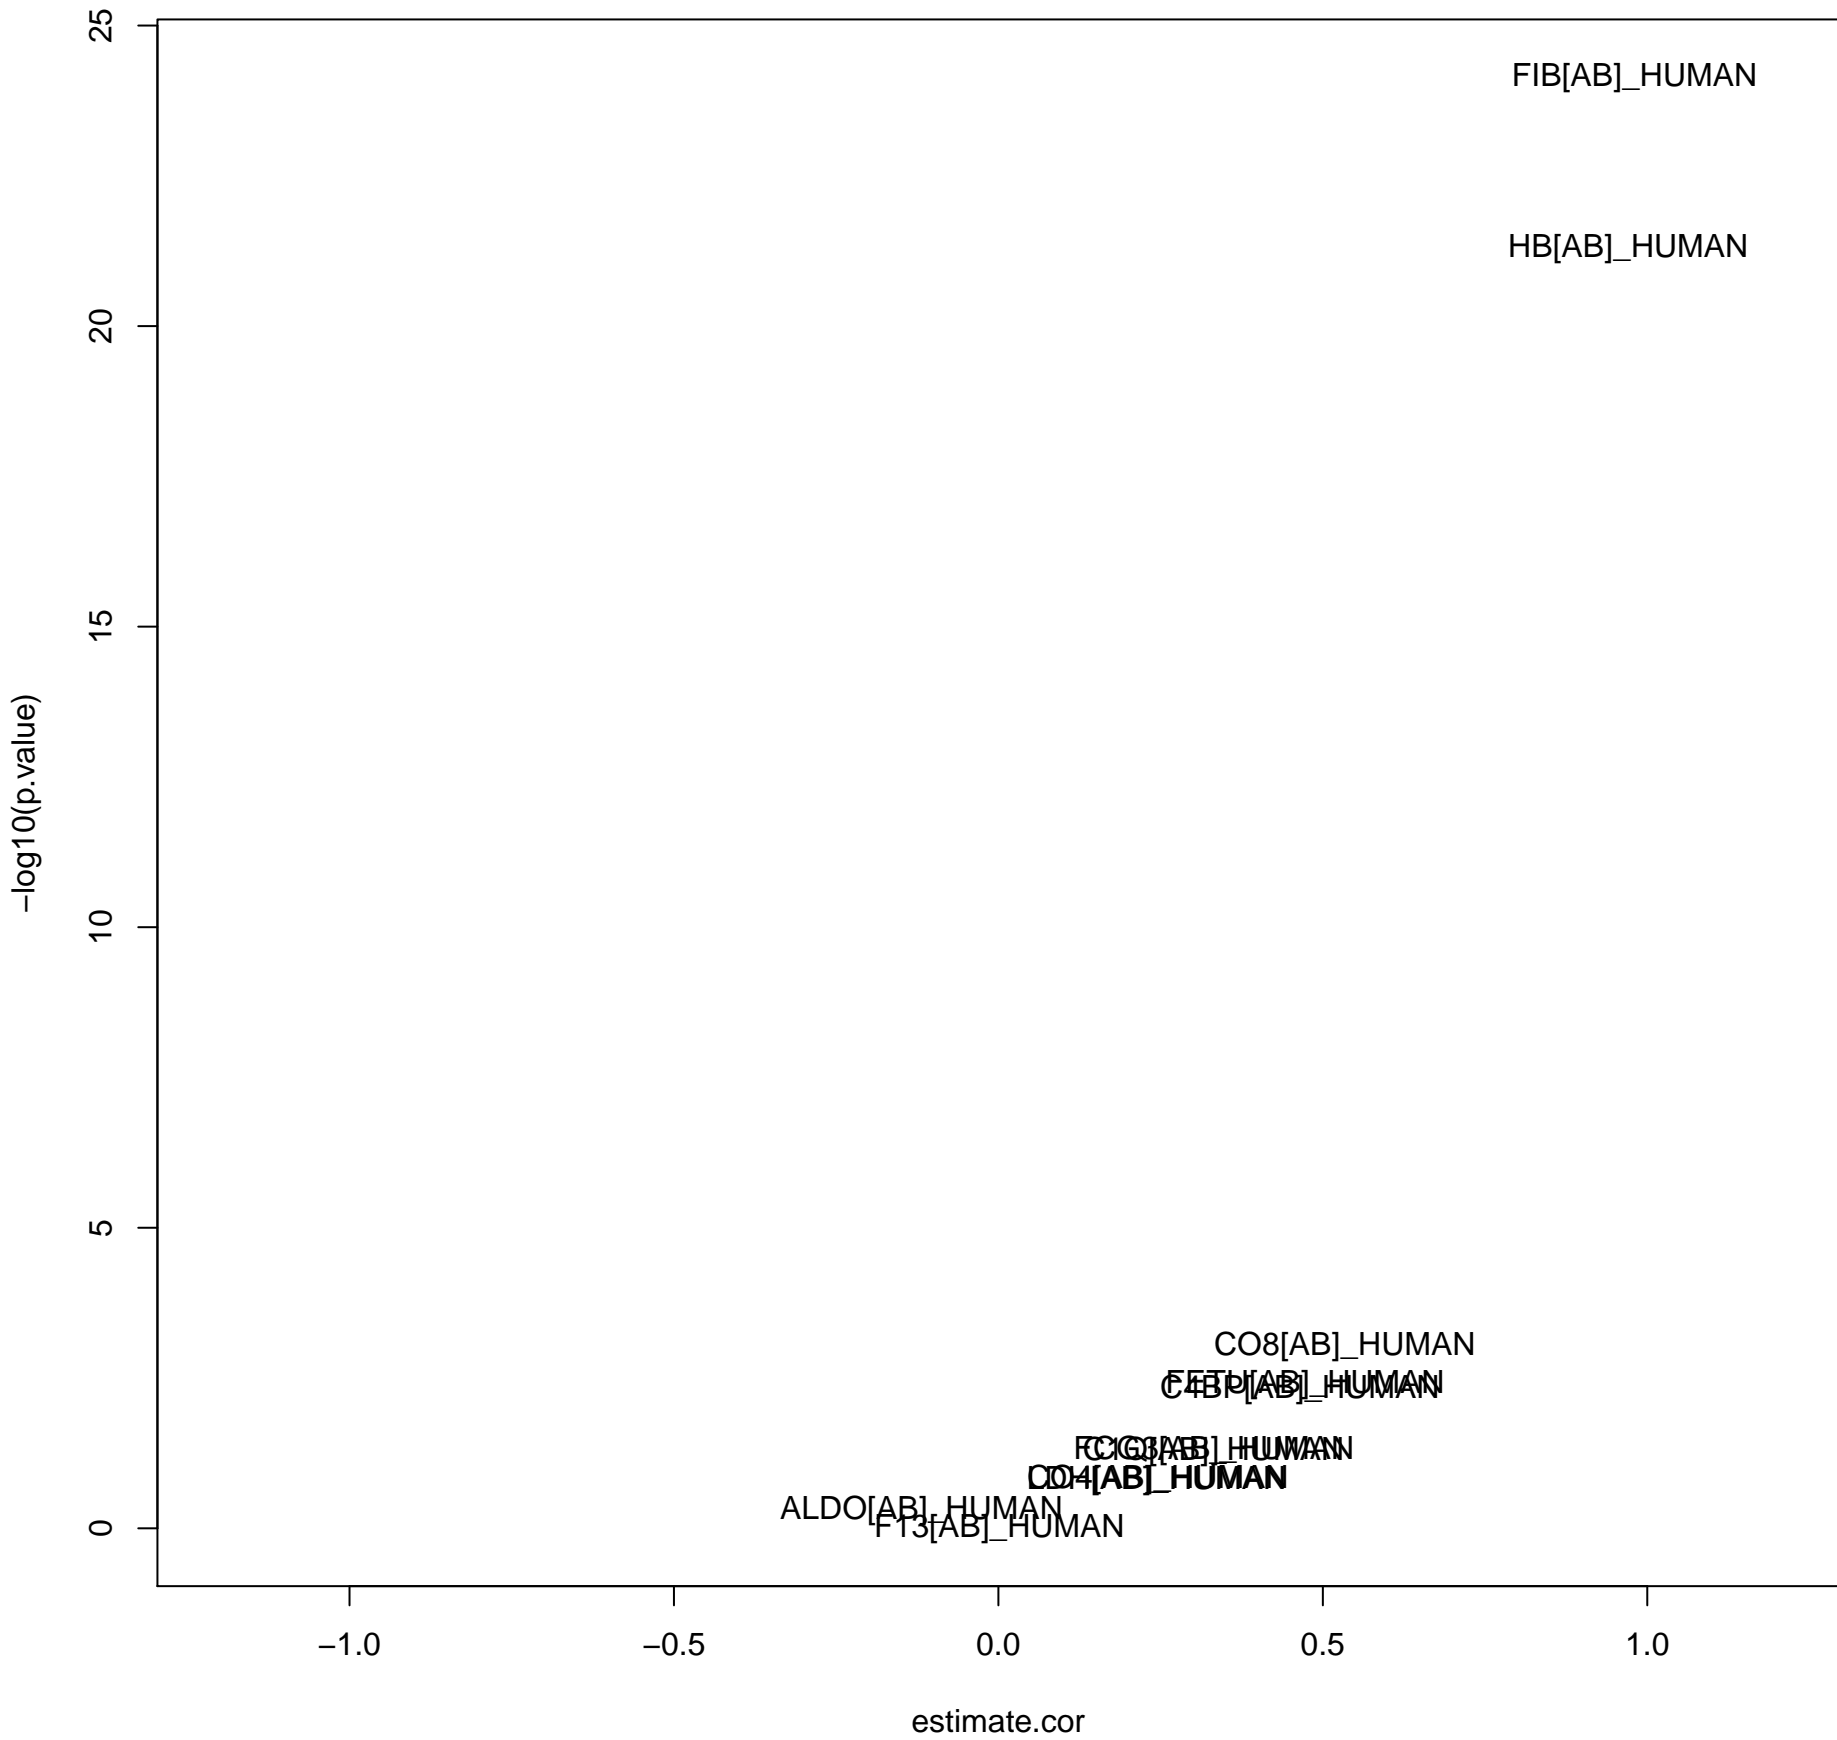



FIB[AB]\_HUMAN subunit A vs B  
cor=0.98; p=7e-25

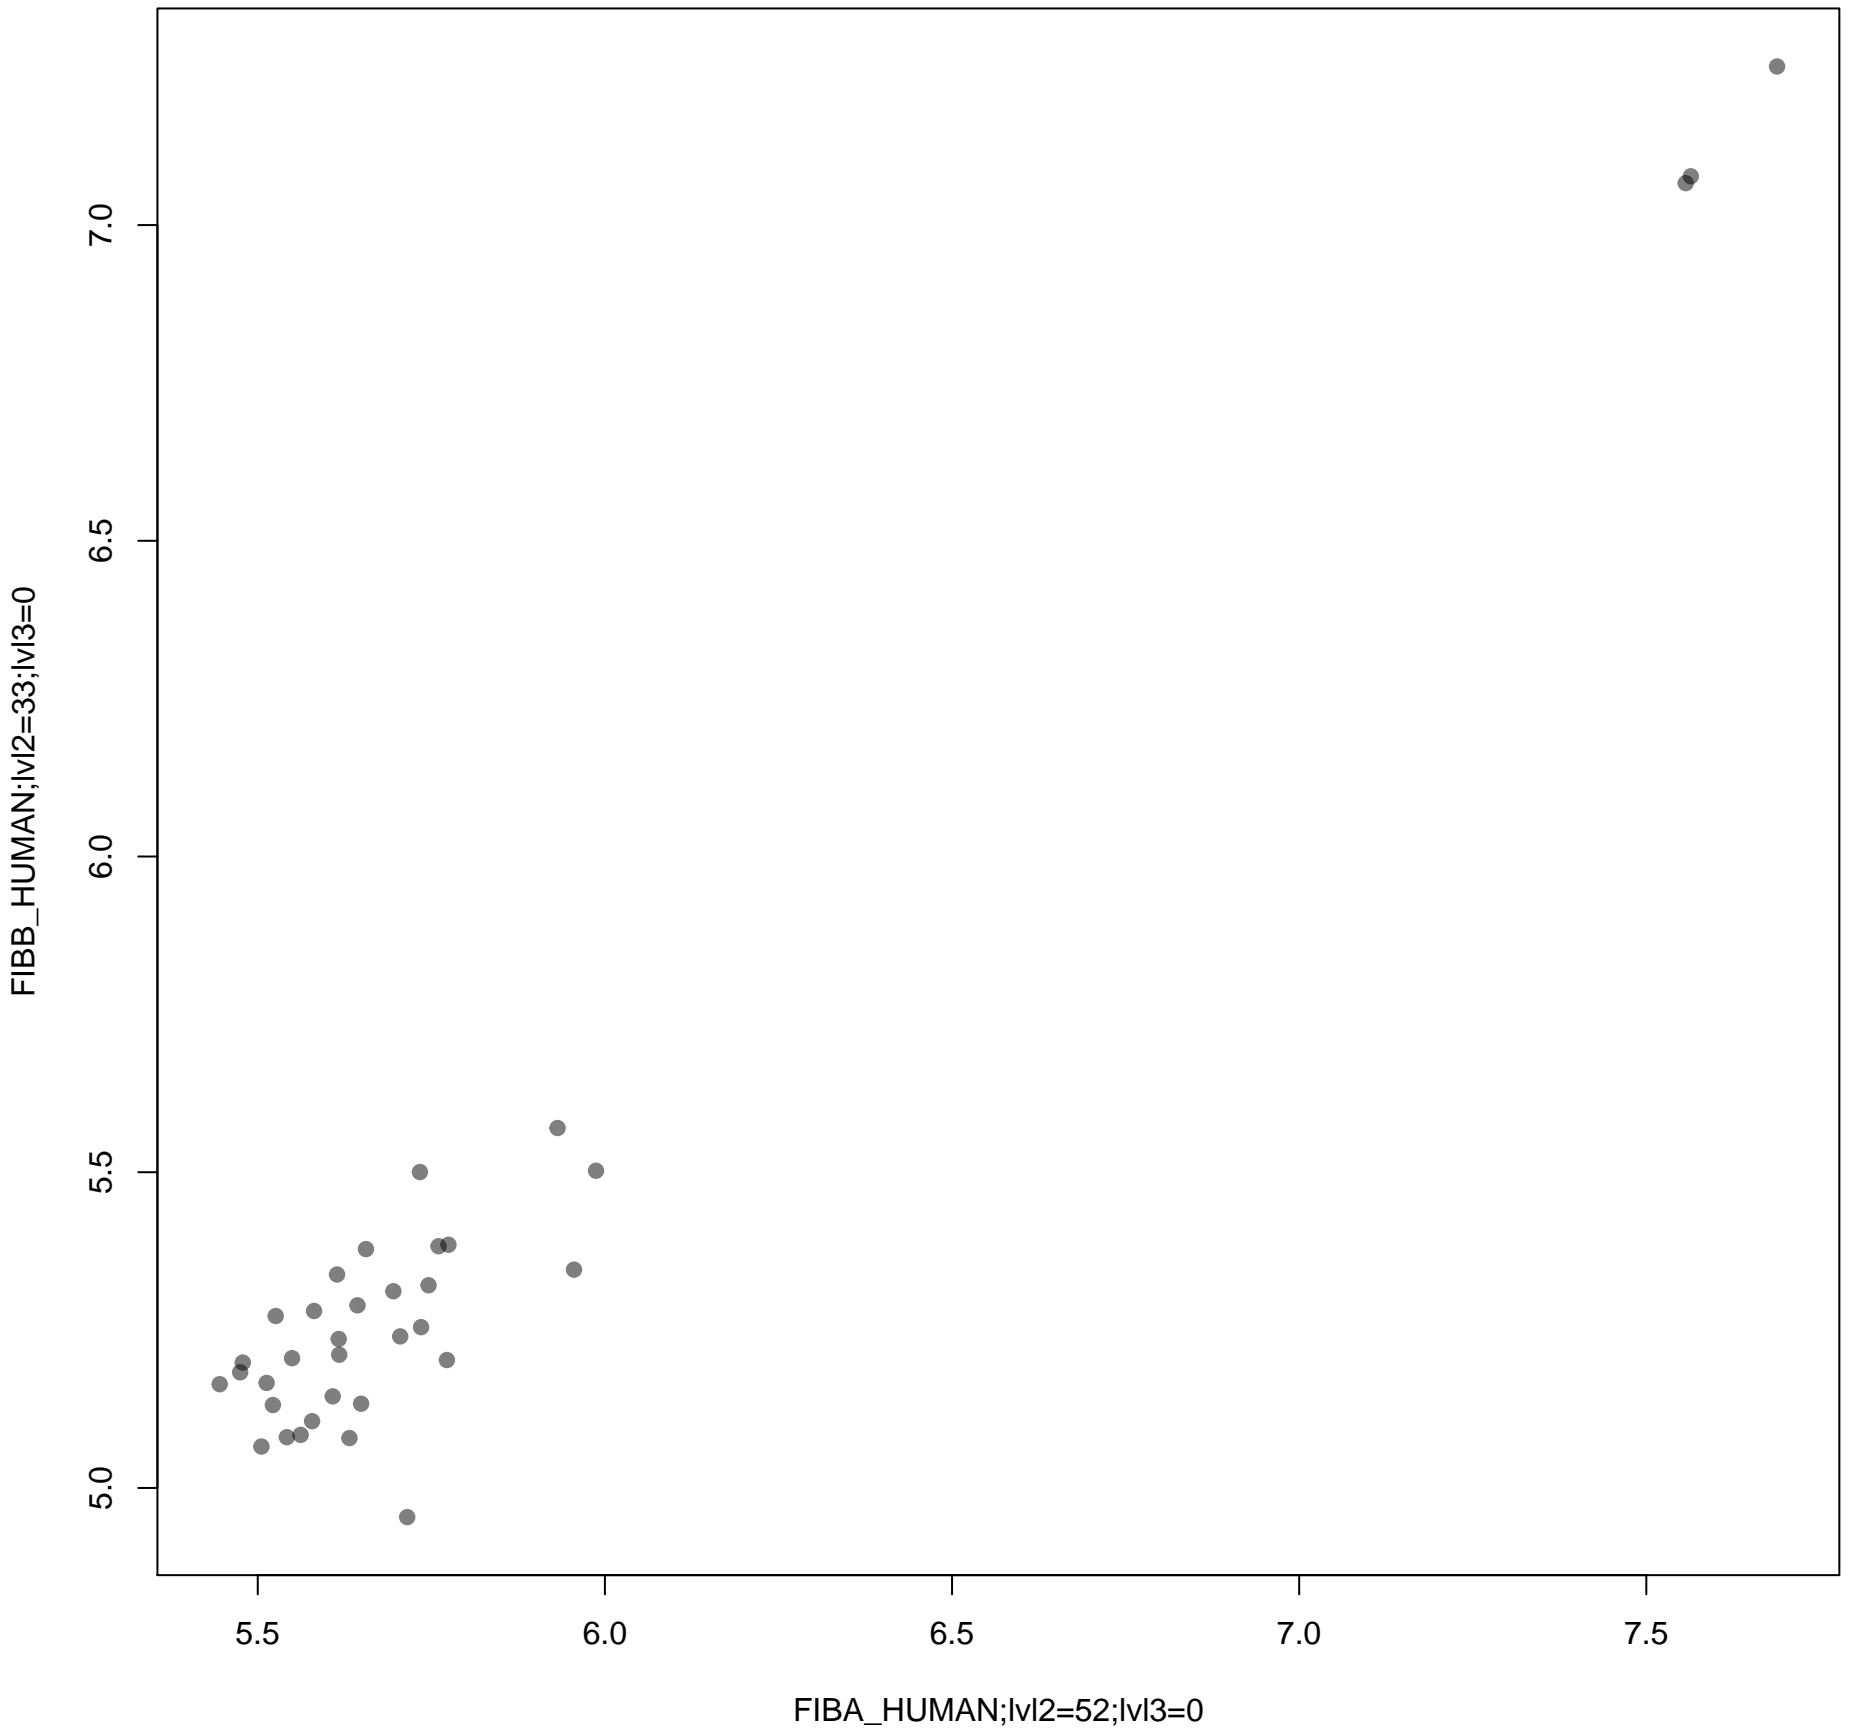

HB[AB]\_HUMAN subunit A vs B  
cor=0.97; p=5e-22

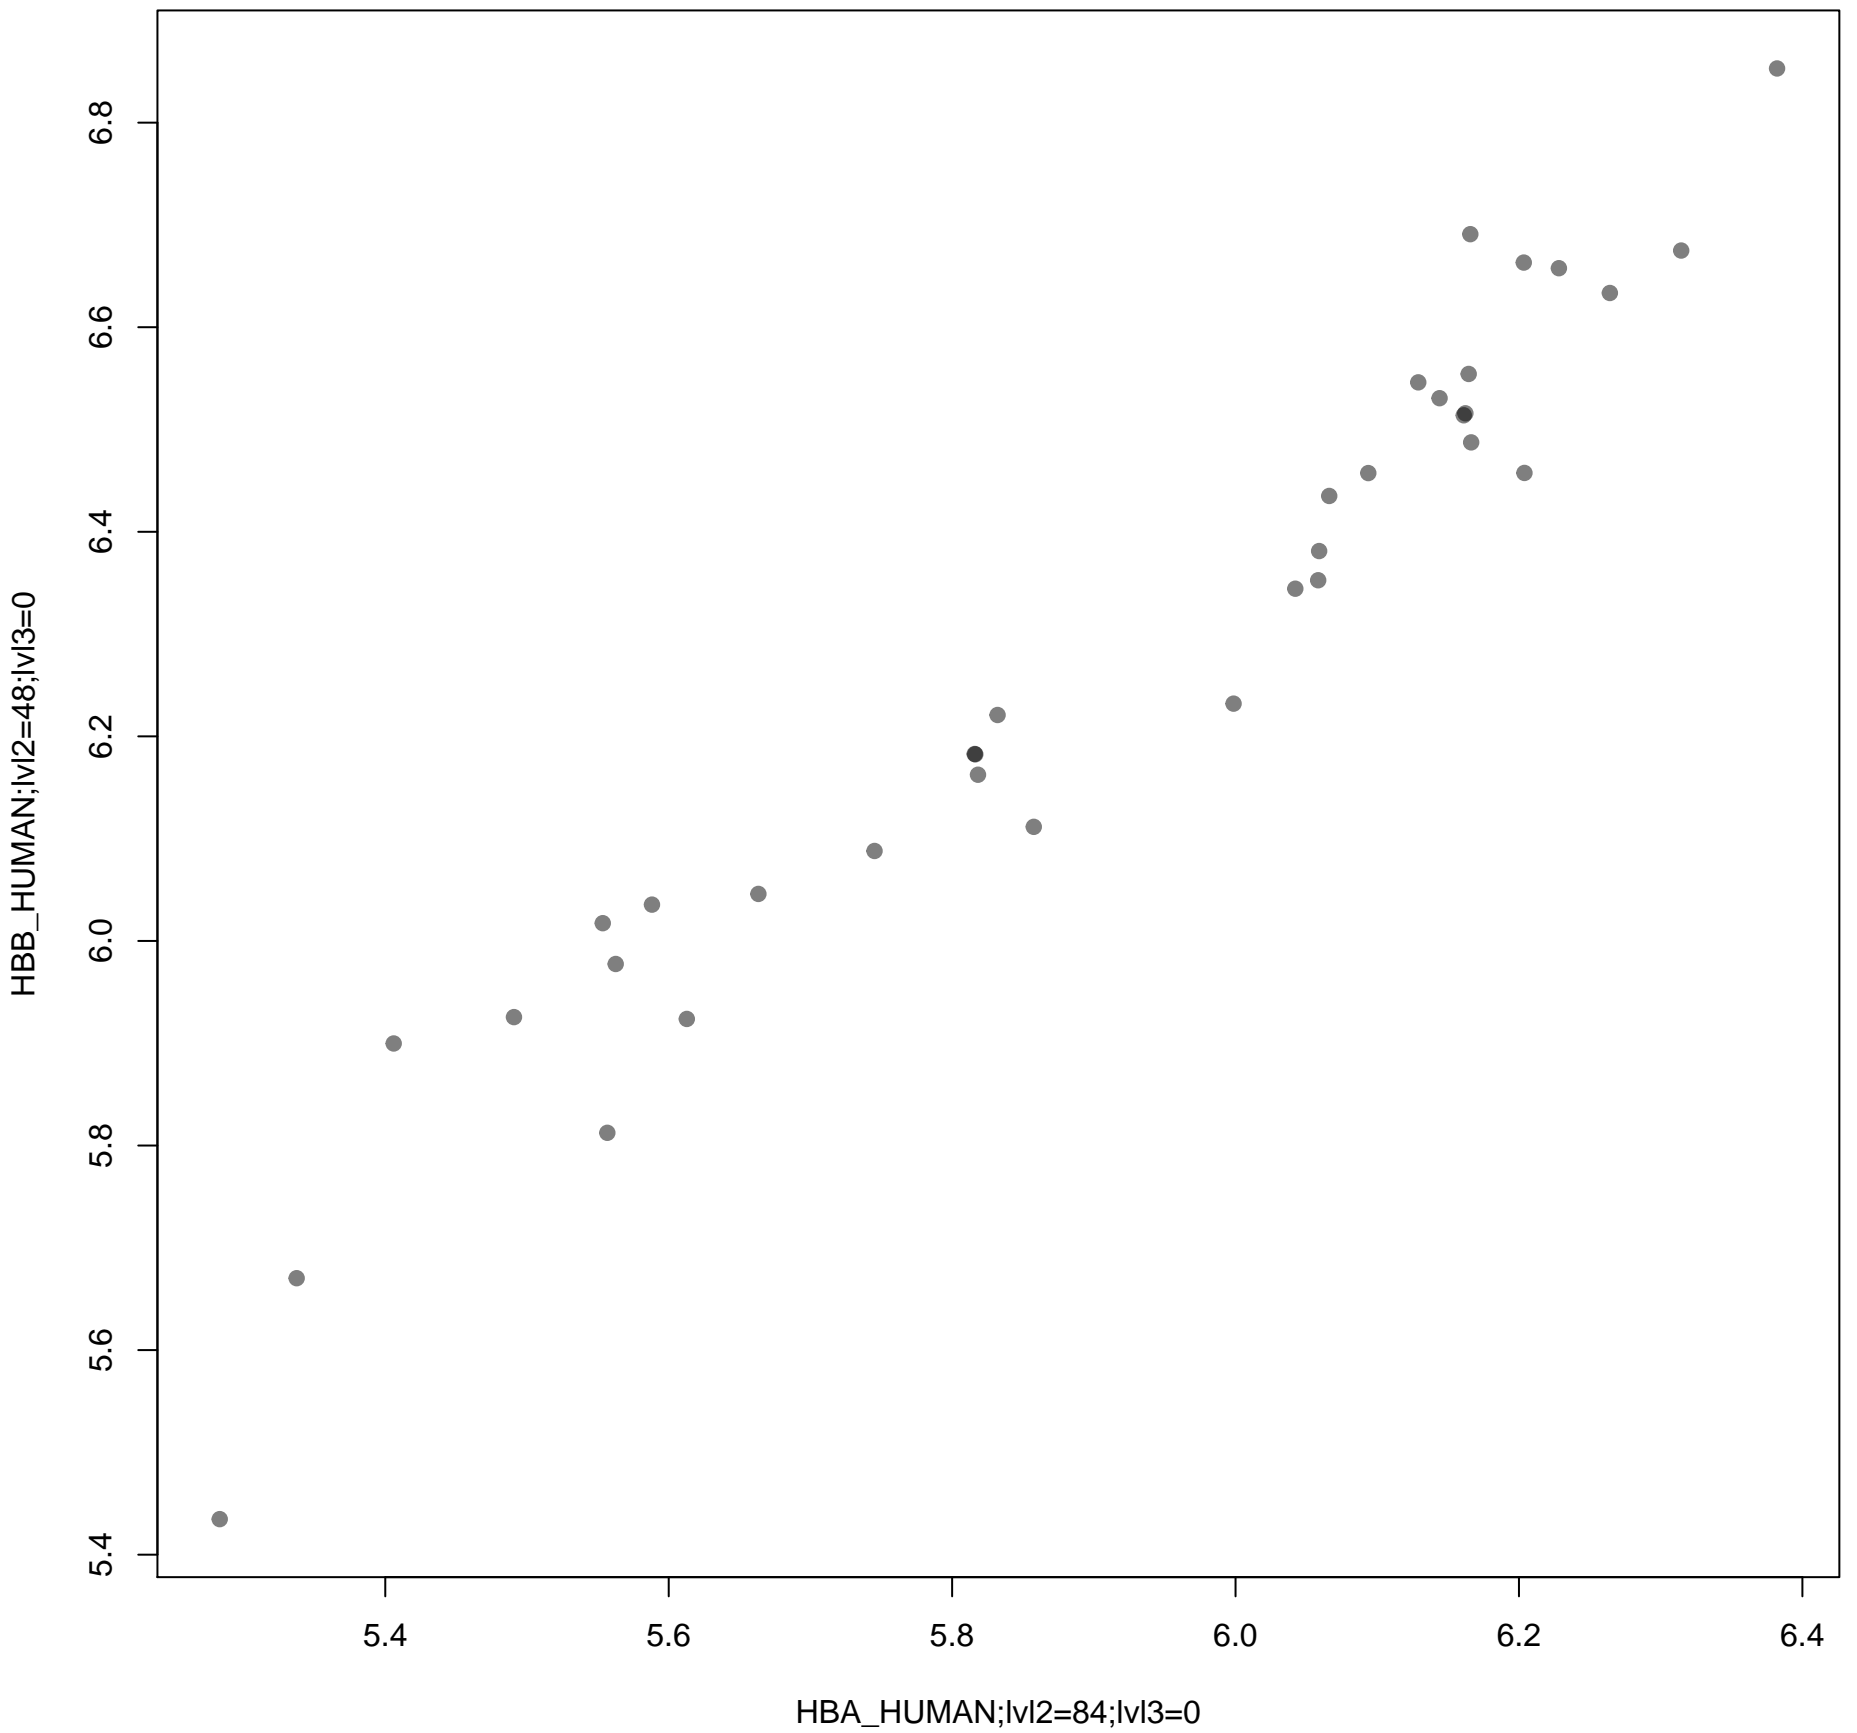

CO8[AB]\_HUMAN subunit A vs B  
cor=0.53; p=0.001

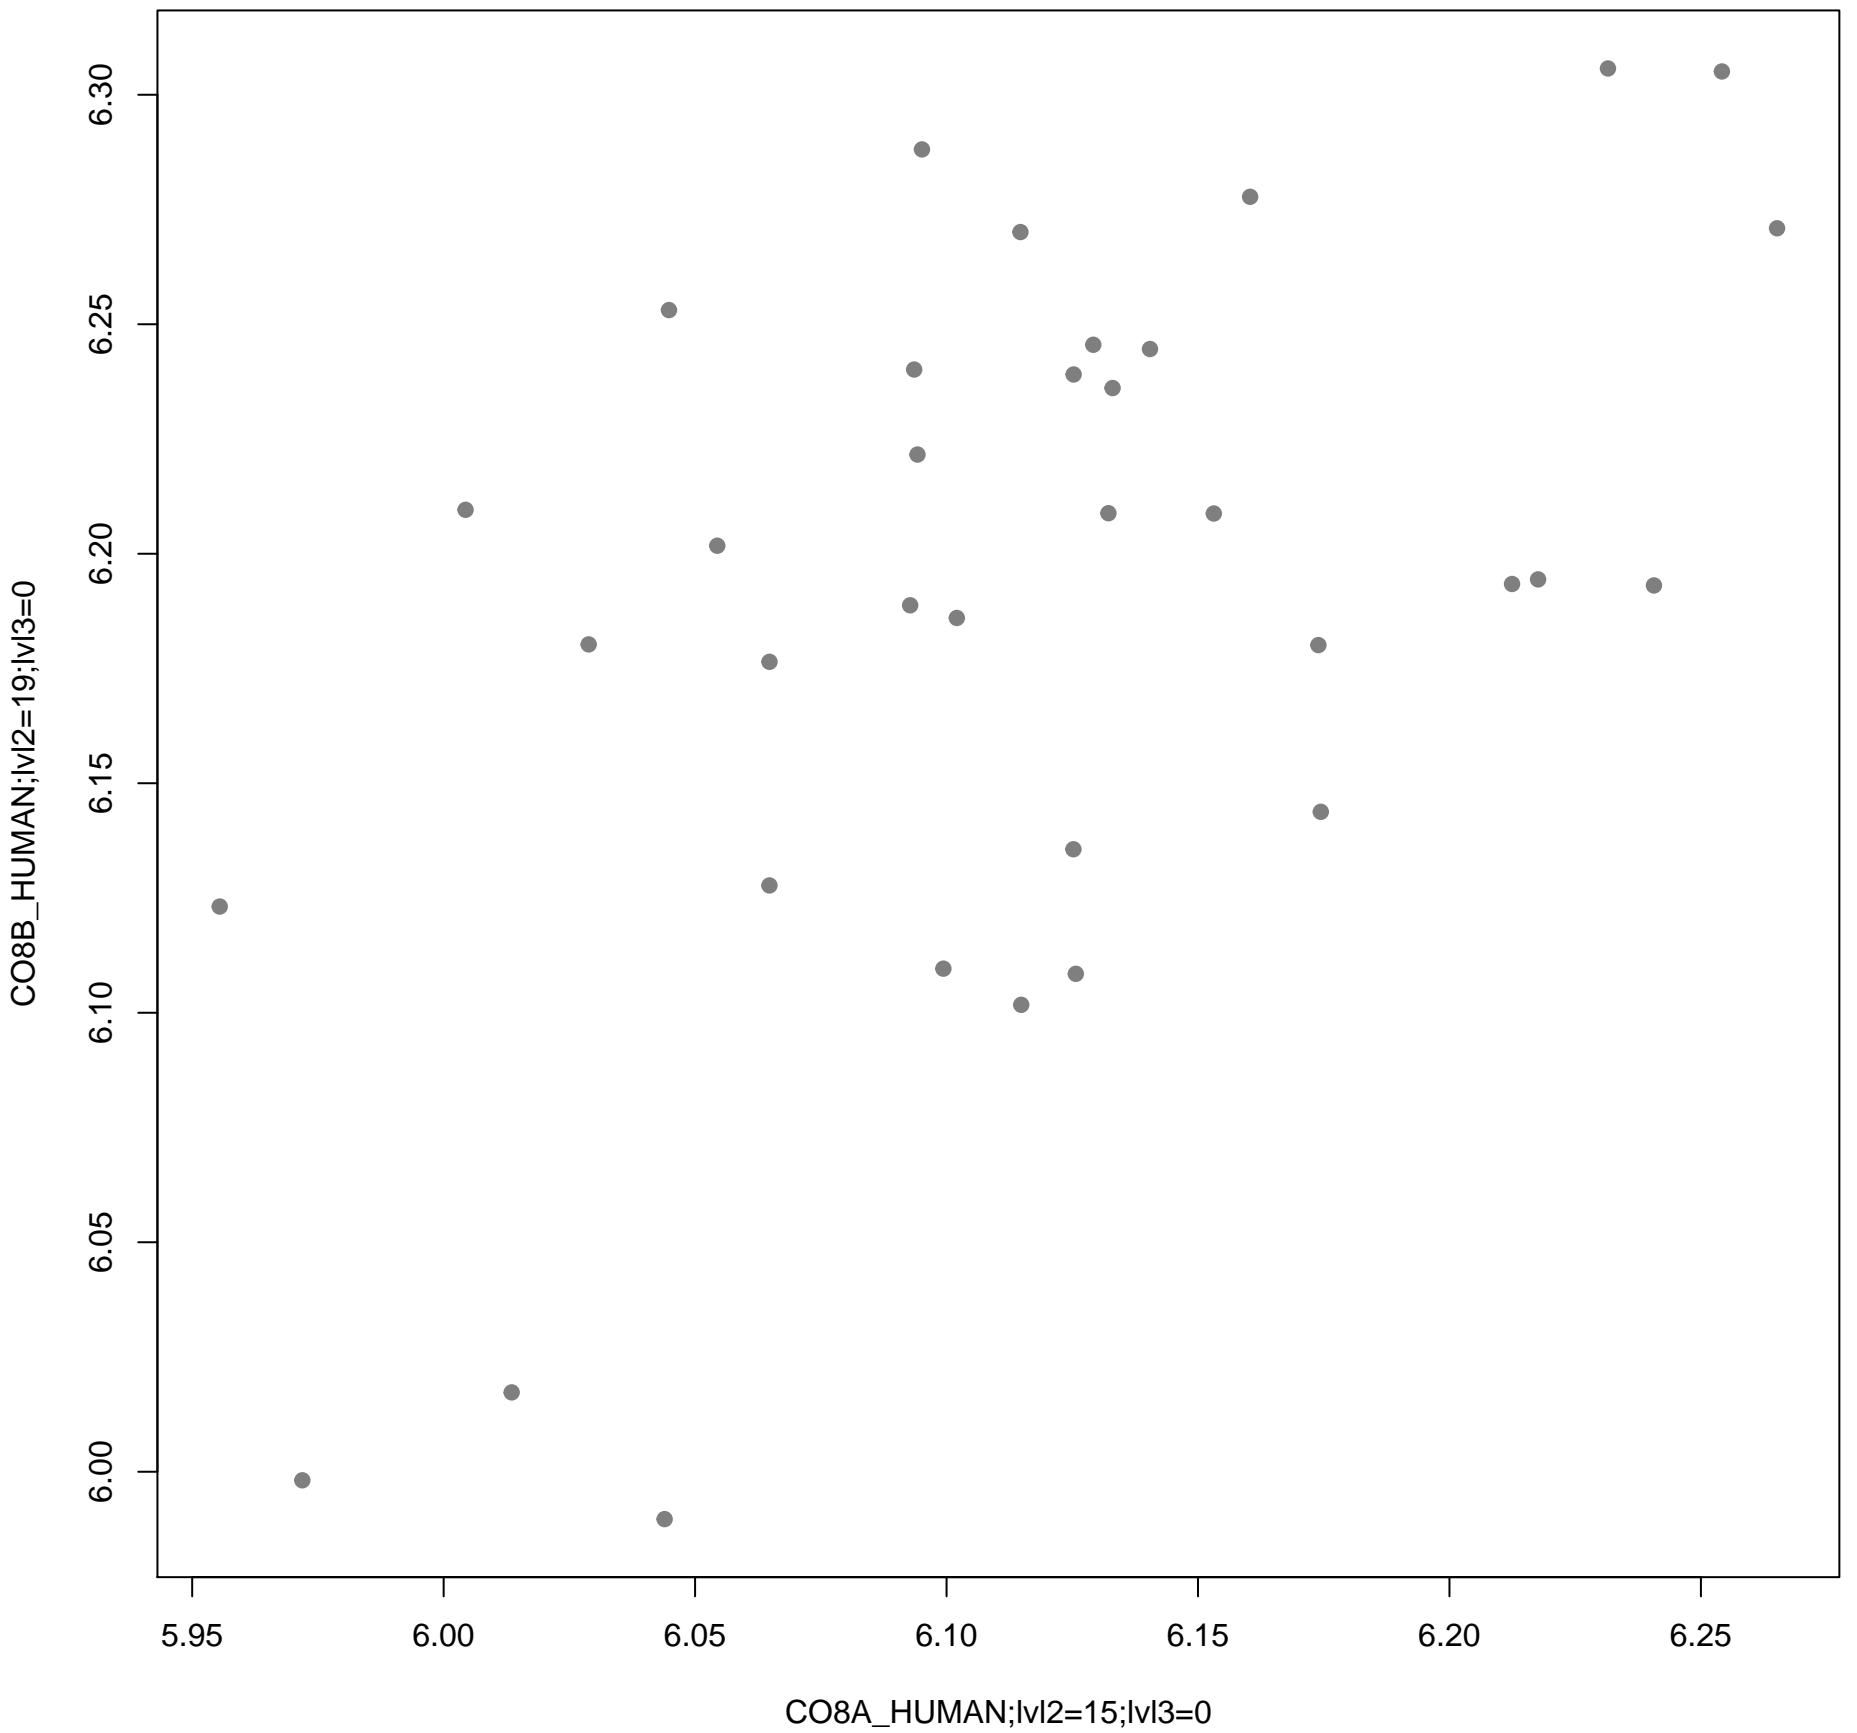

# FETU[AB]\_HUMAN subunit A vs B

cor=0.47; p=0.004

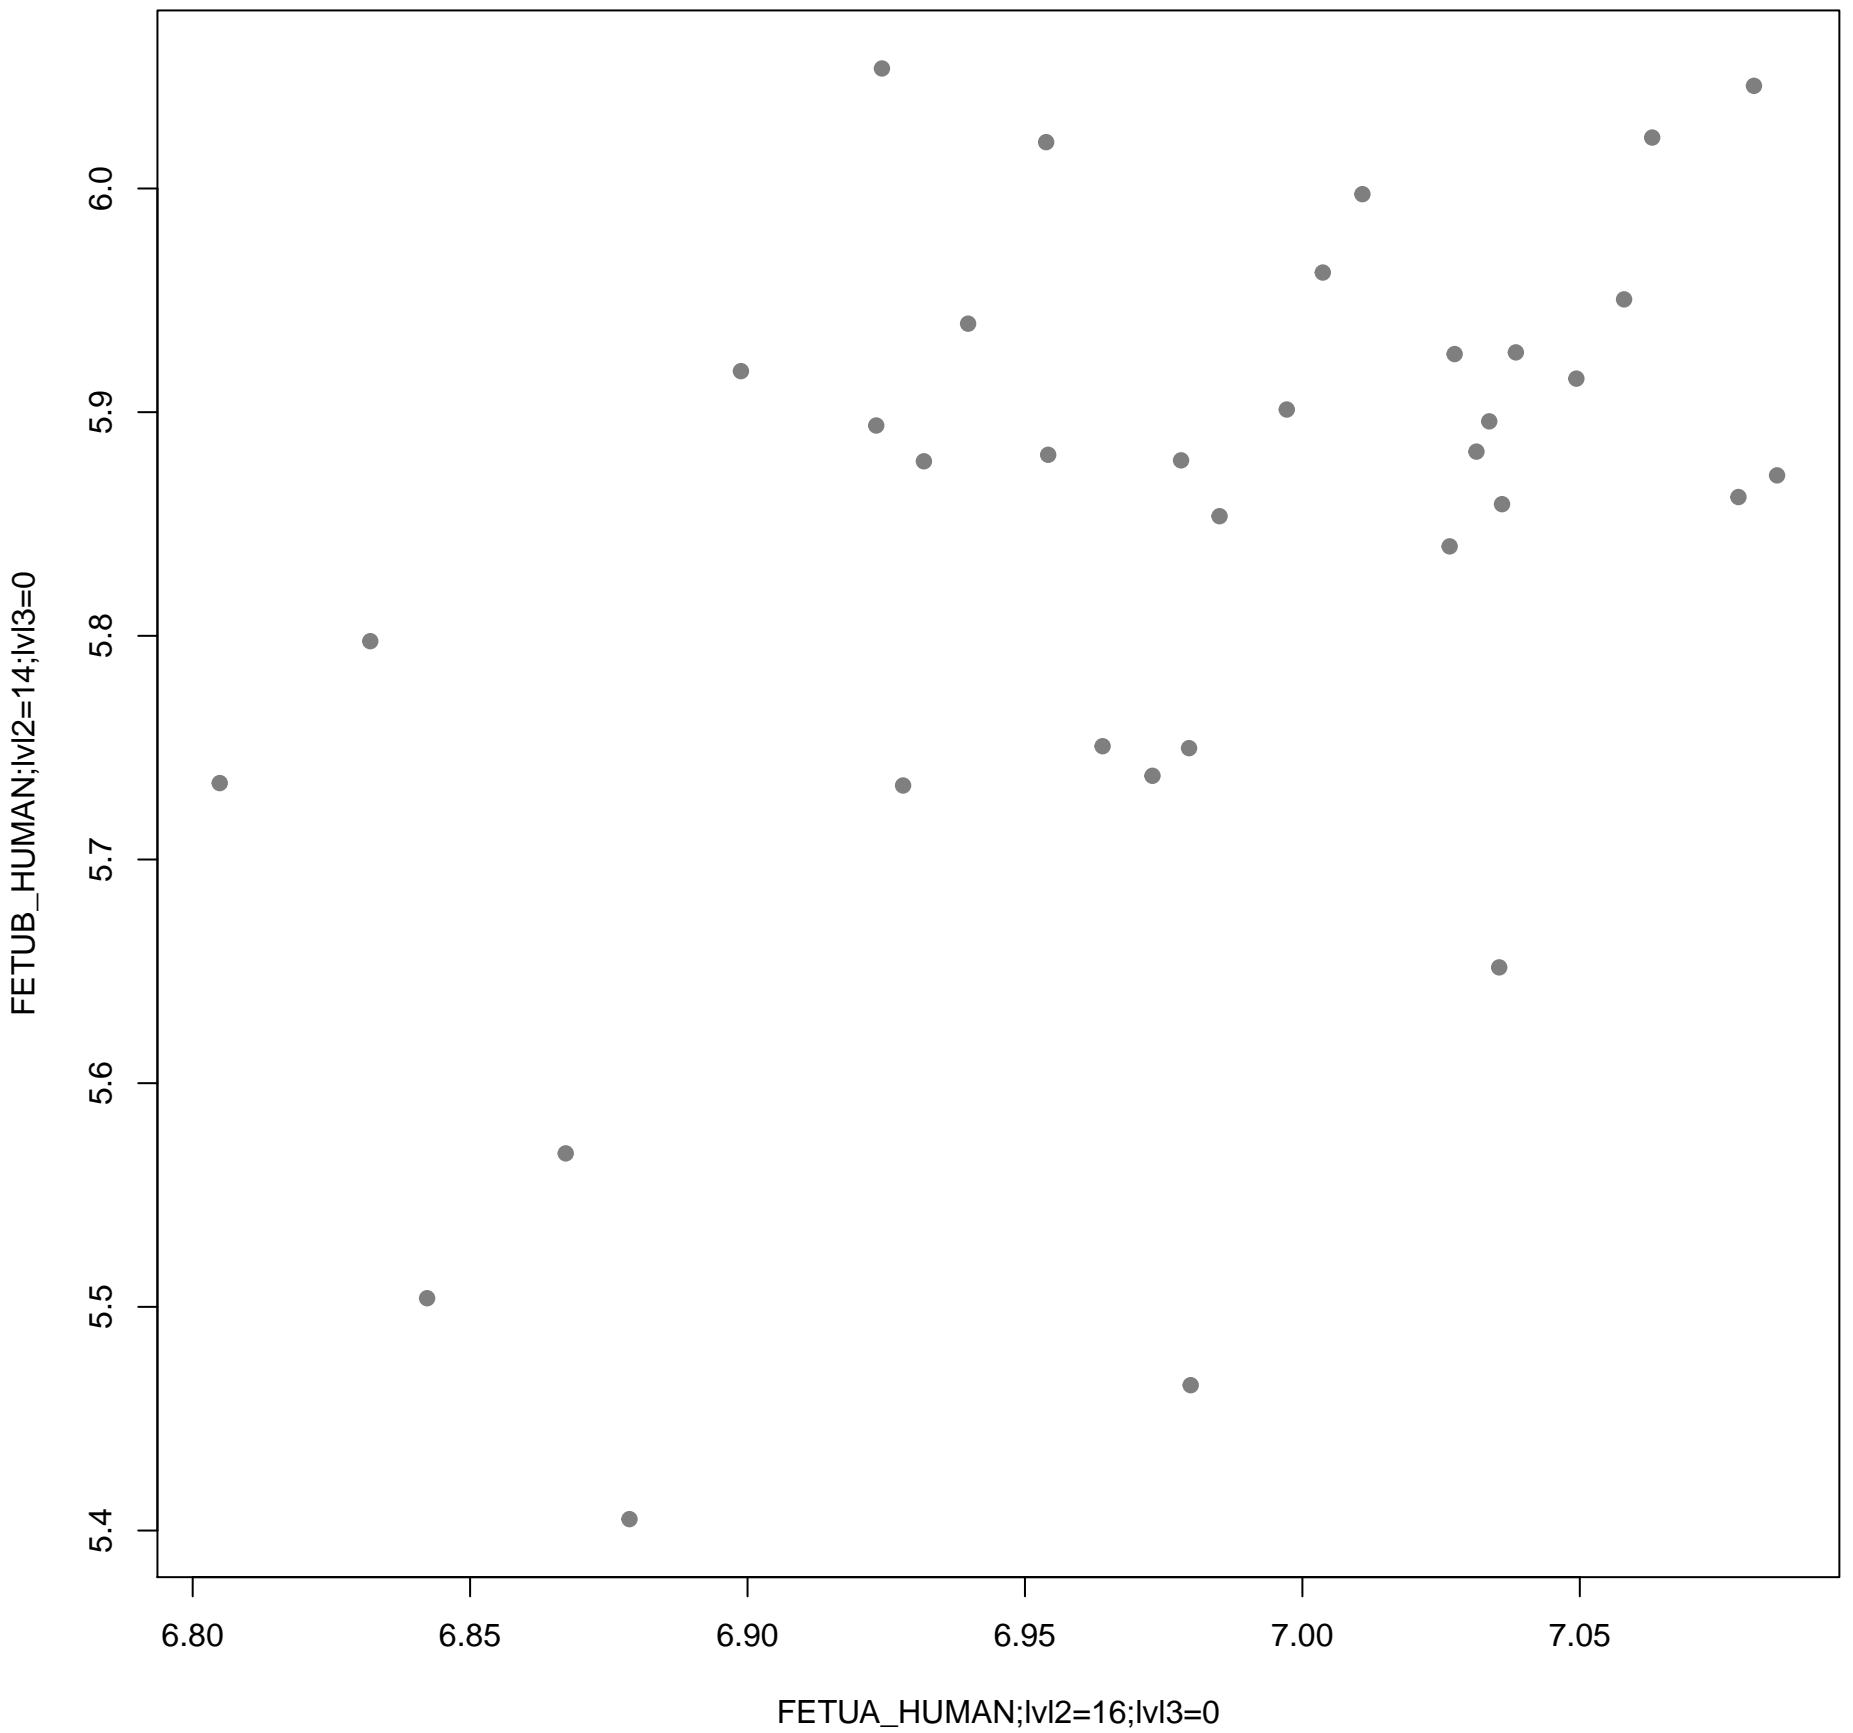

C4BP[AB]\_HUMAN subunit A vs B  
cor=0.46; p=0.005

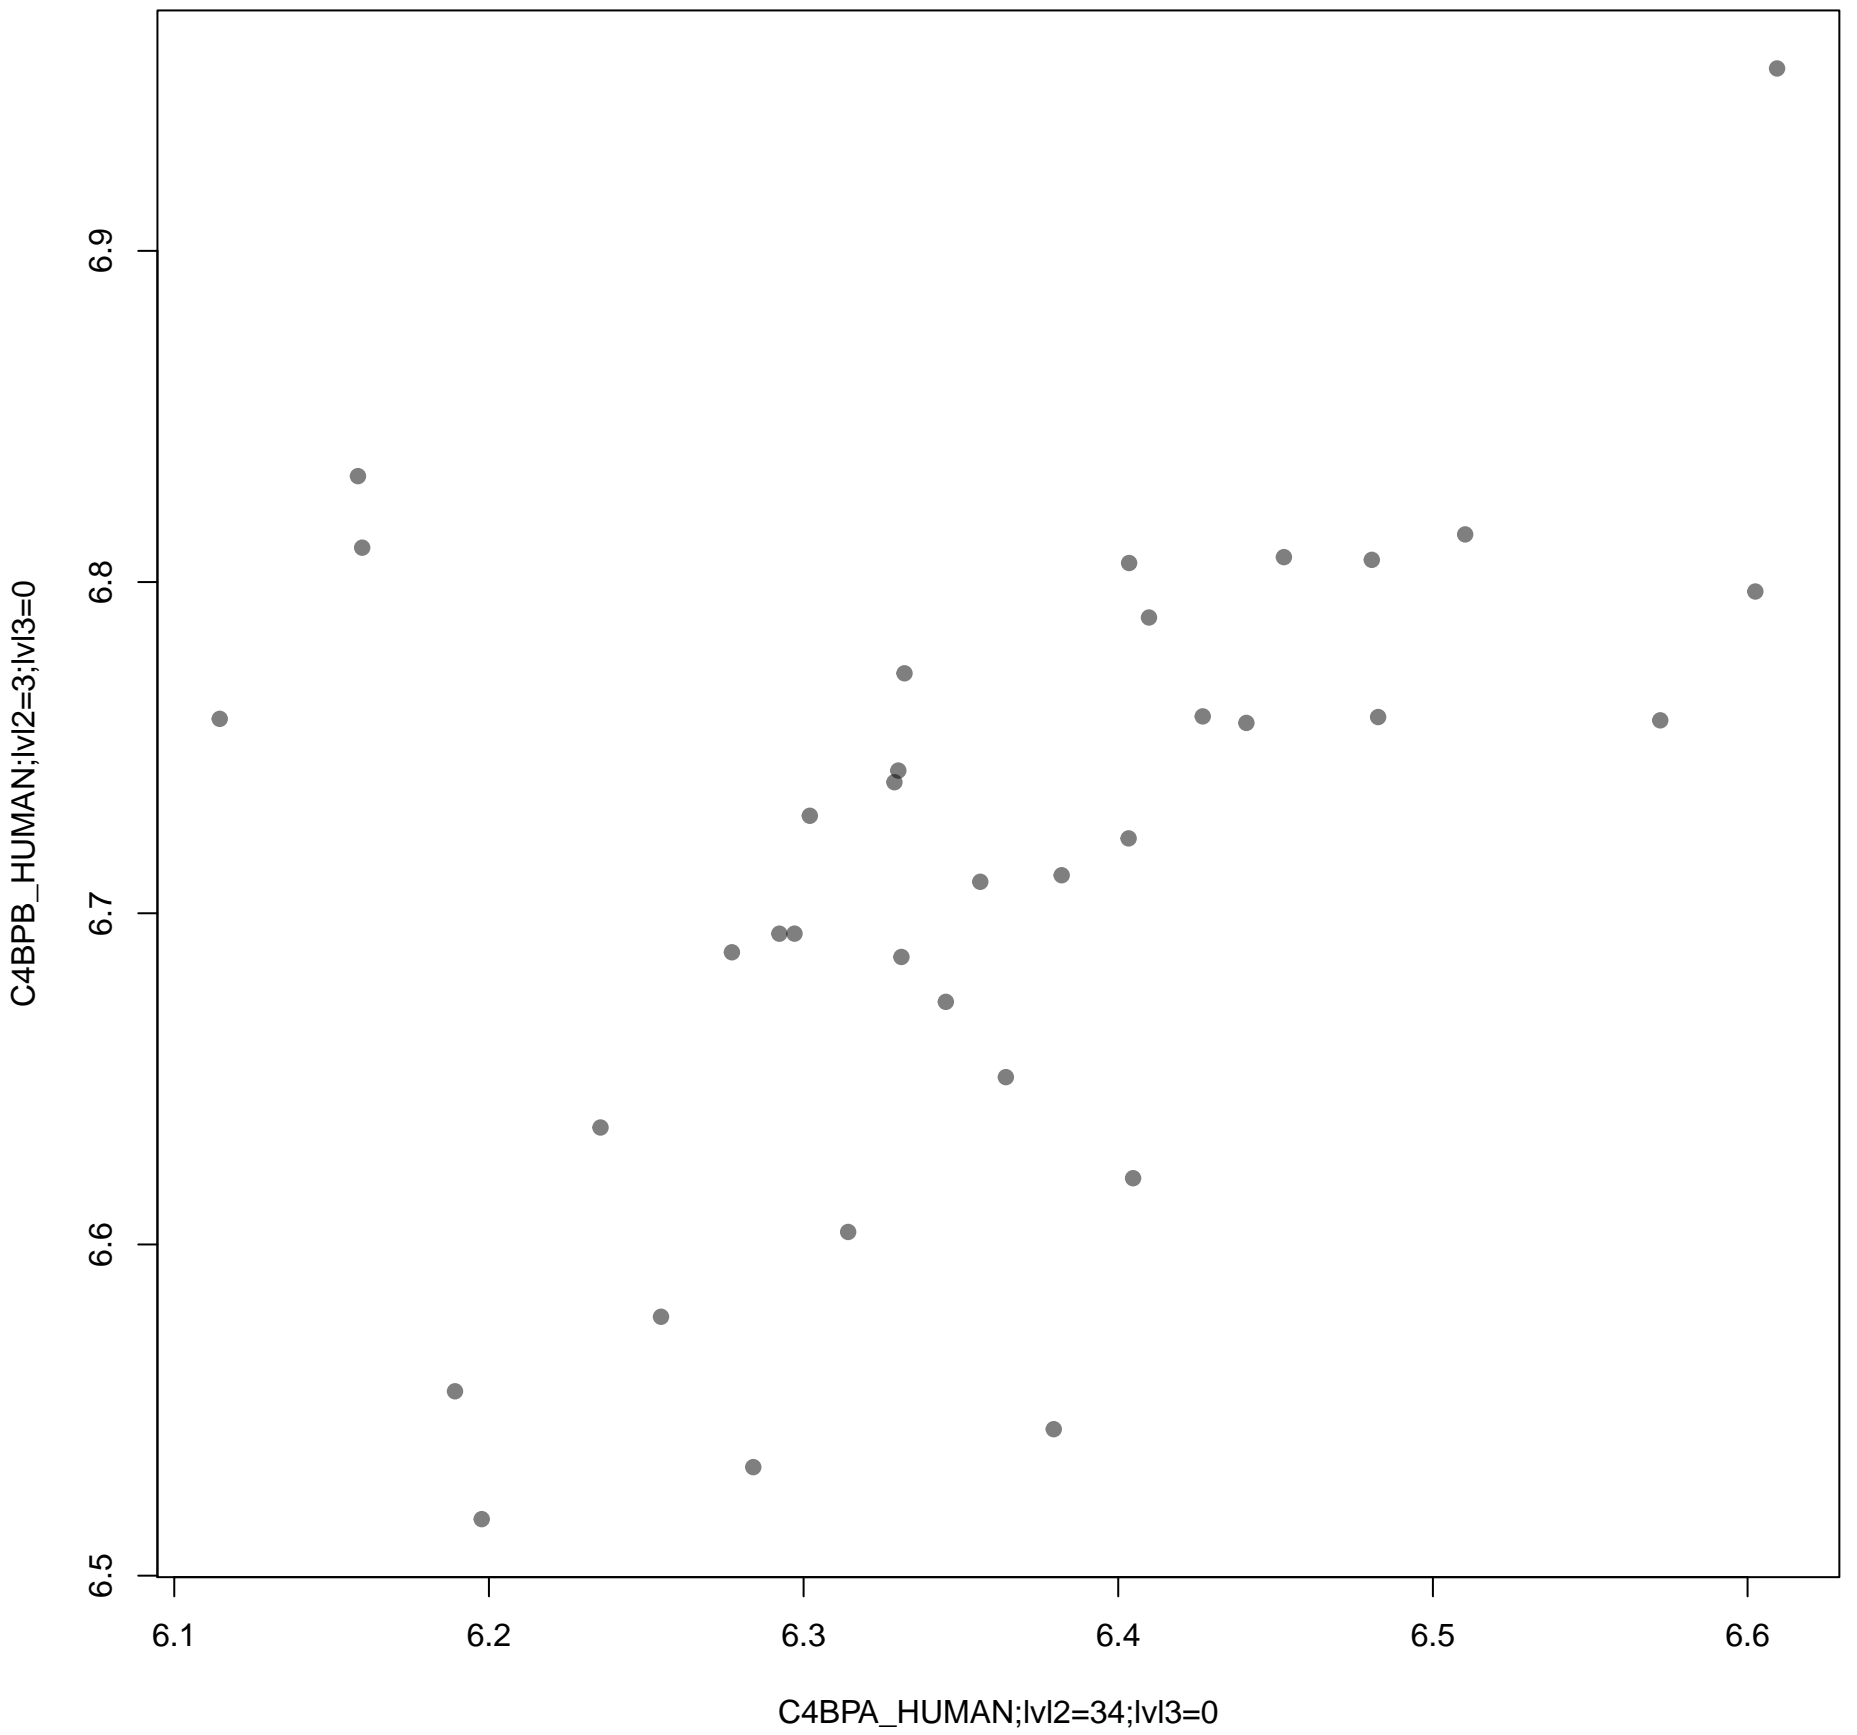

FCG3[AB]\_HUMAN subunit A vs B  
cor=0.33; p=0.05

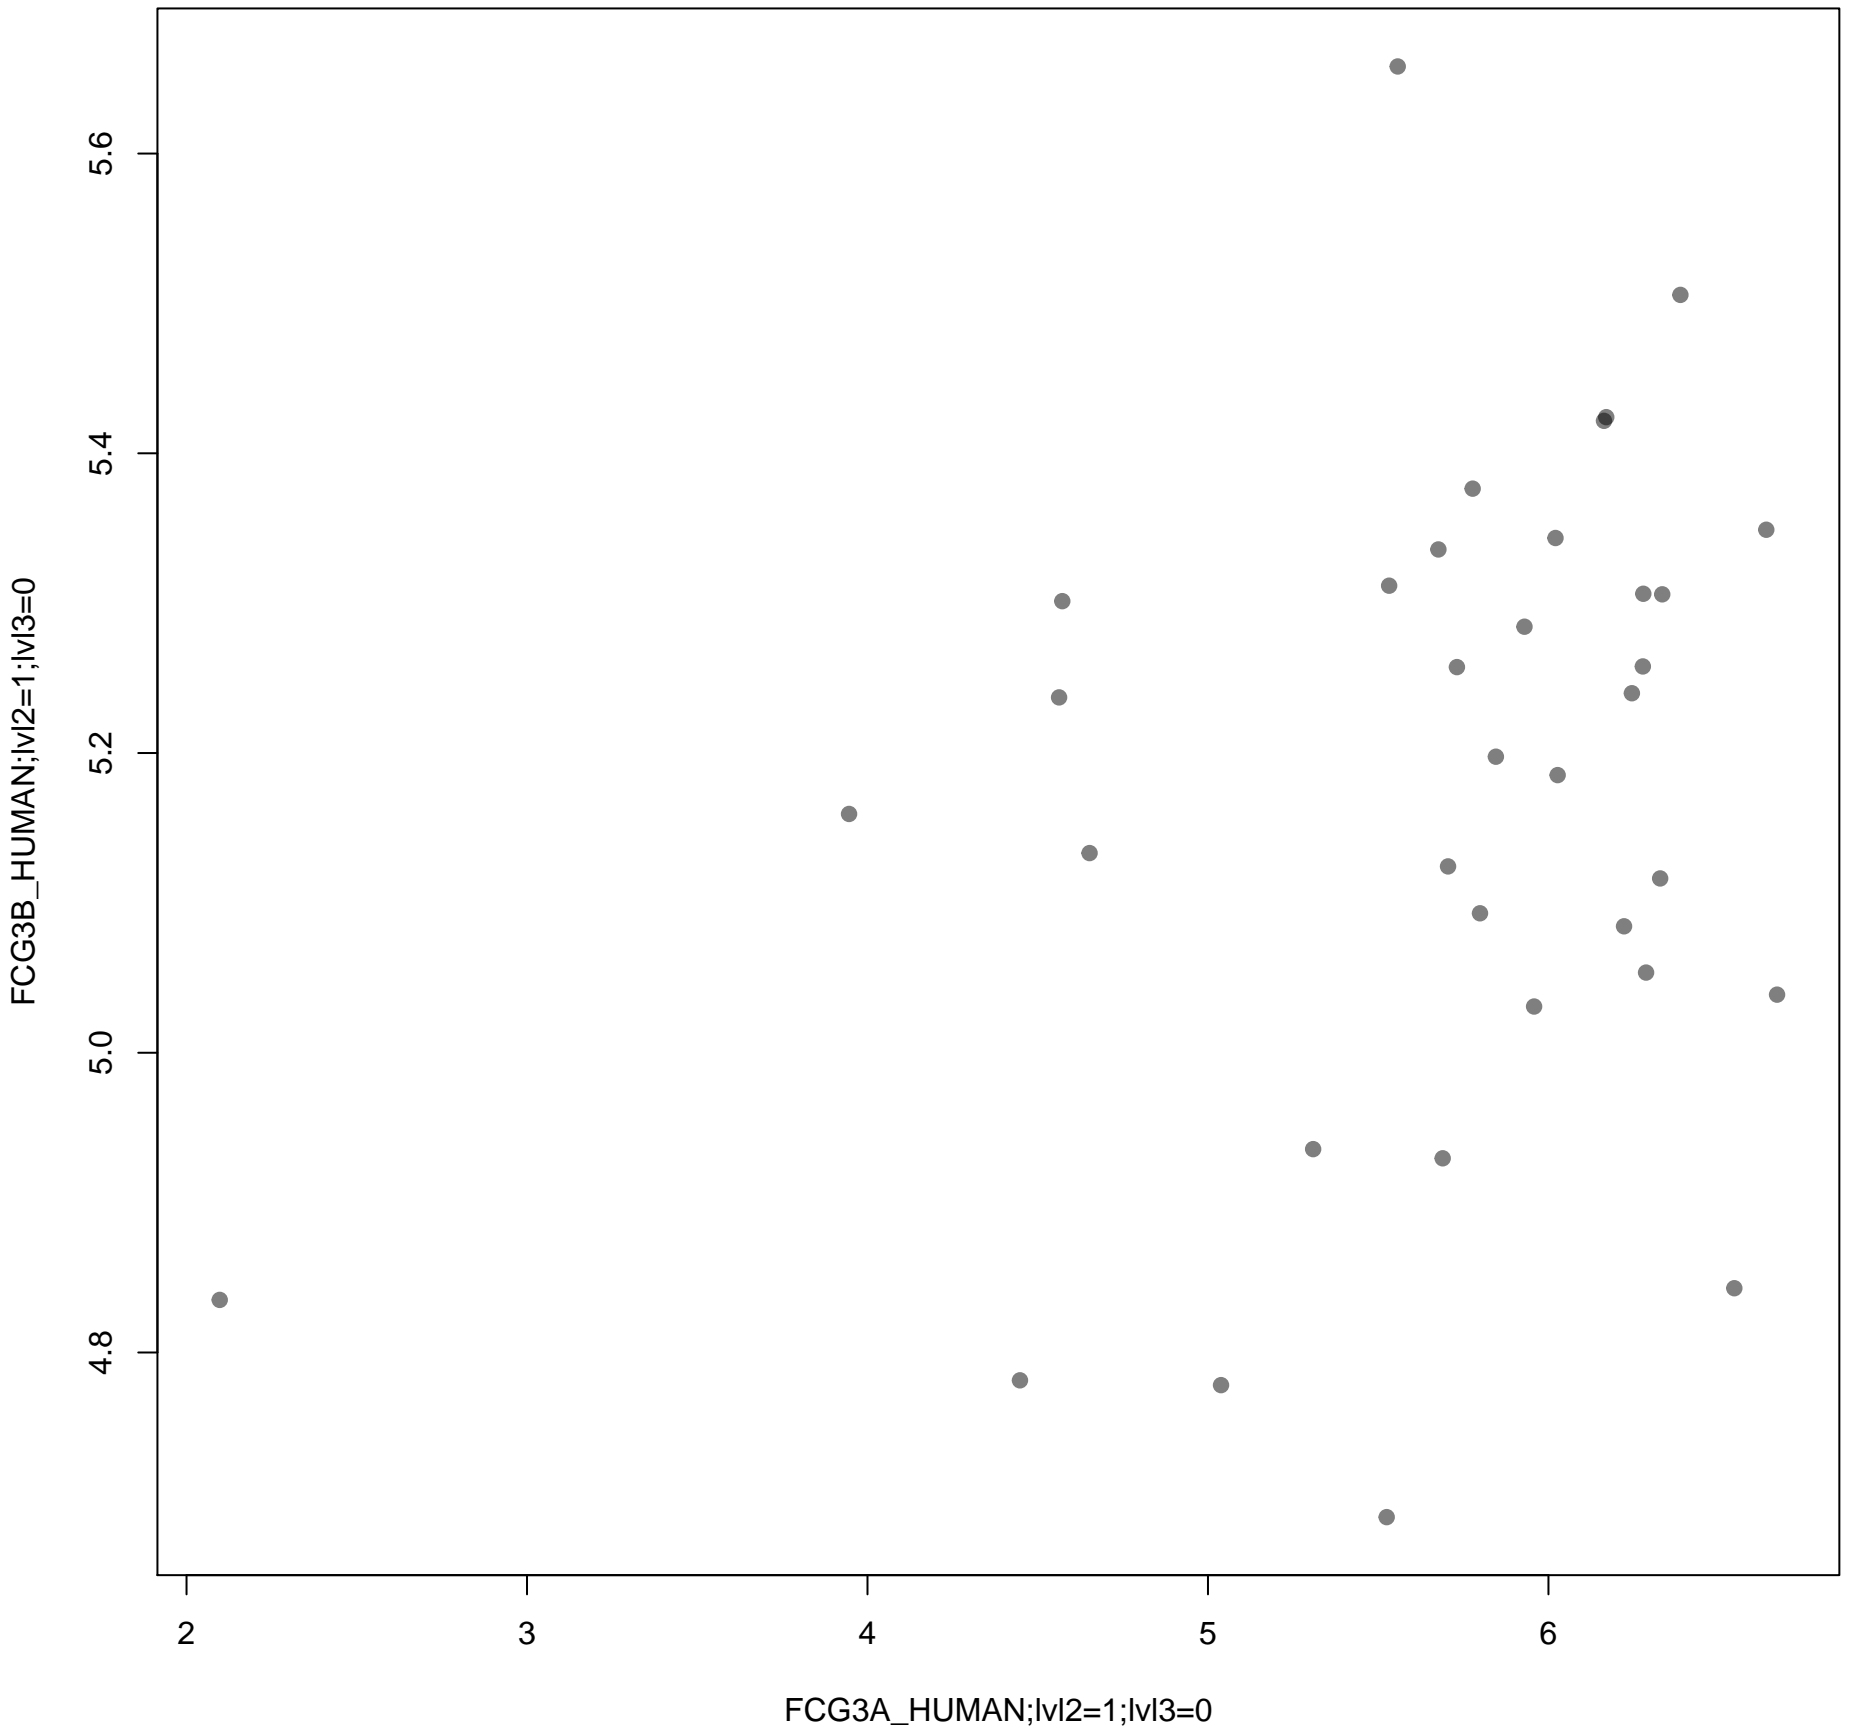

C1Q[AB]\_HUMAN subunit A vs B  
cor=0.33; p=0.05

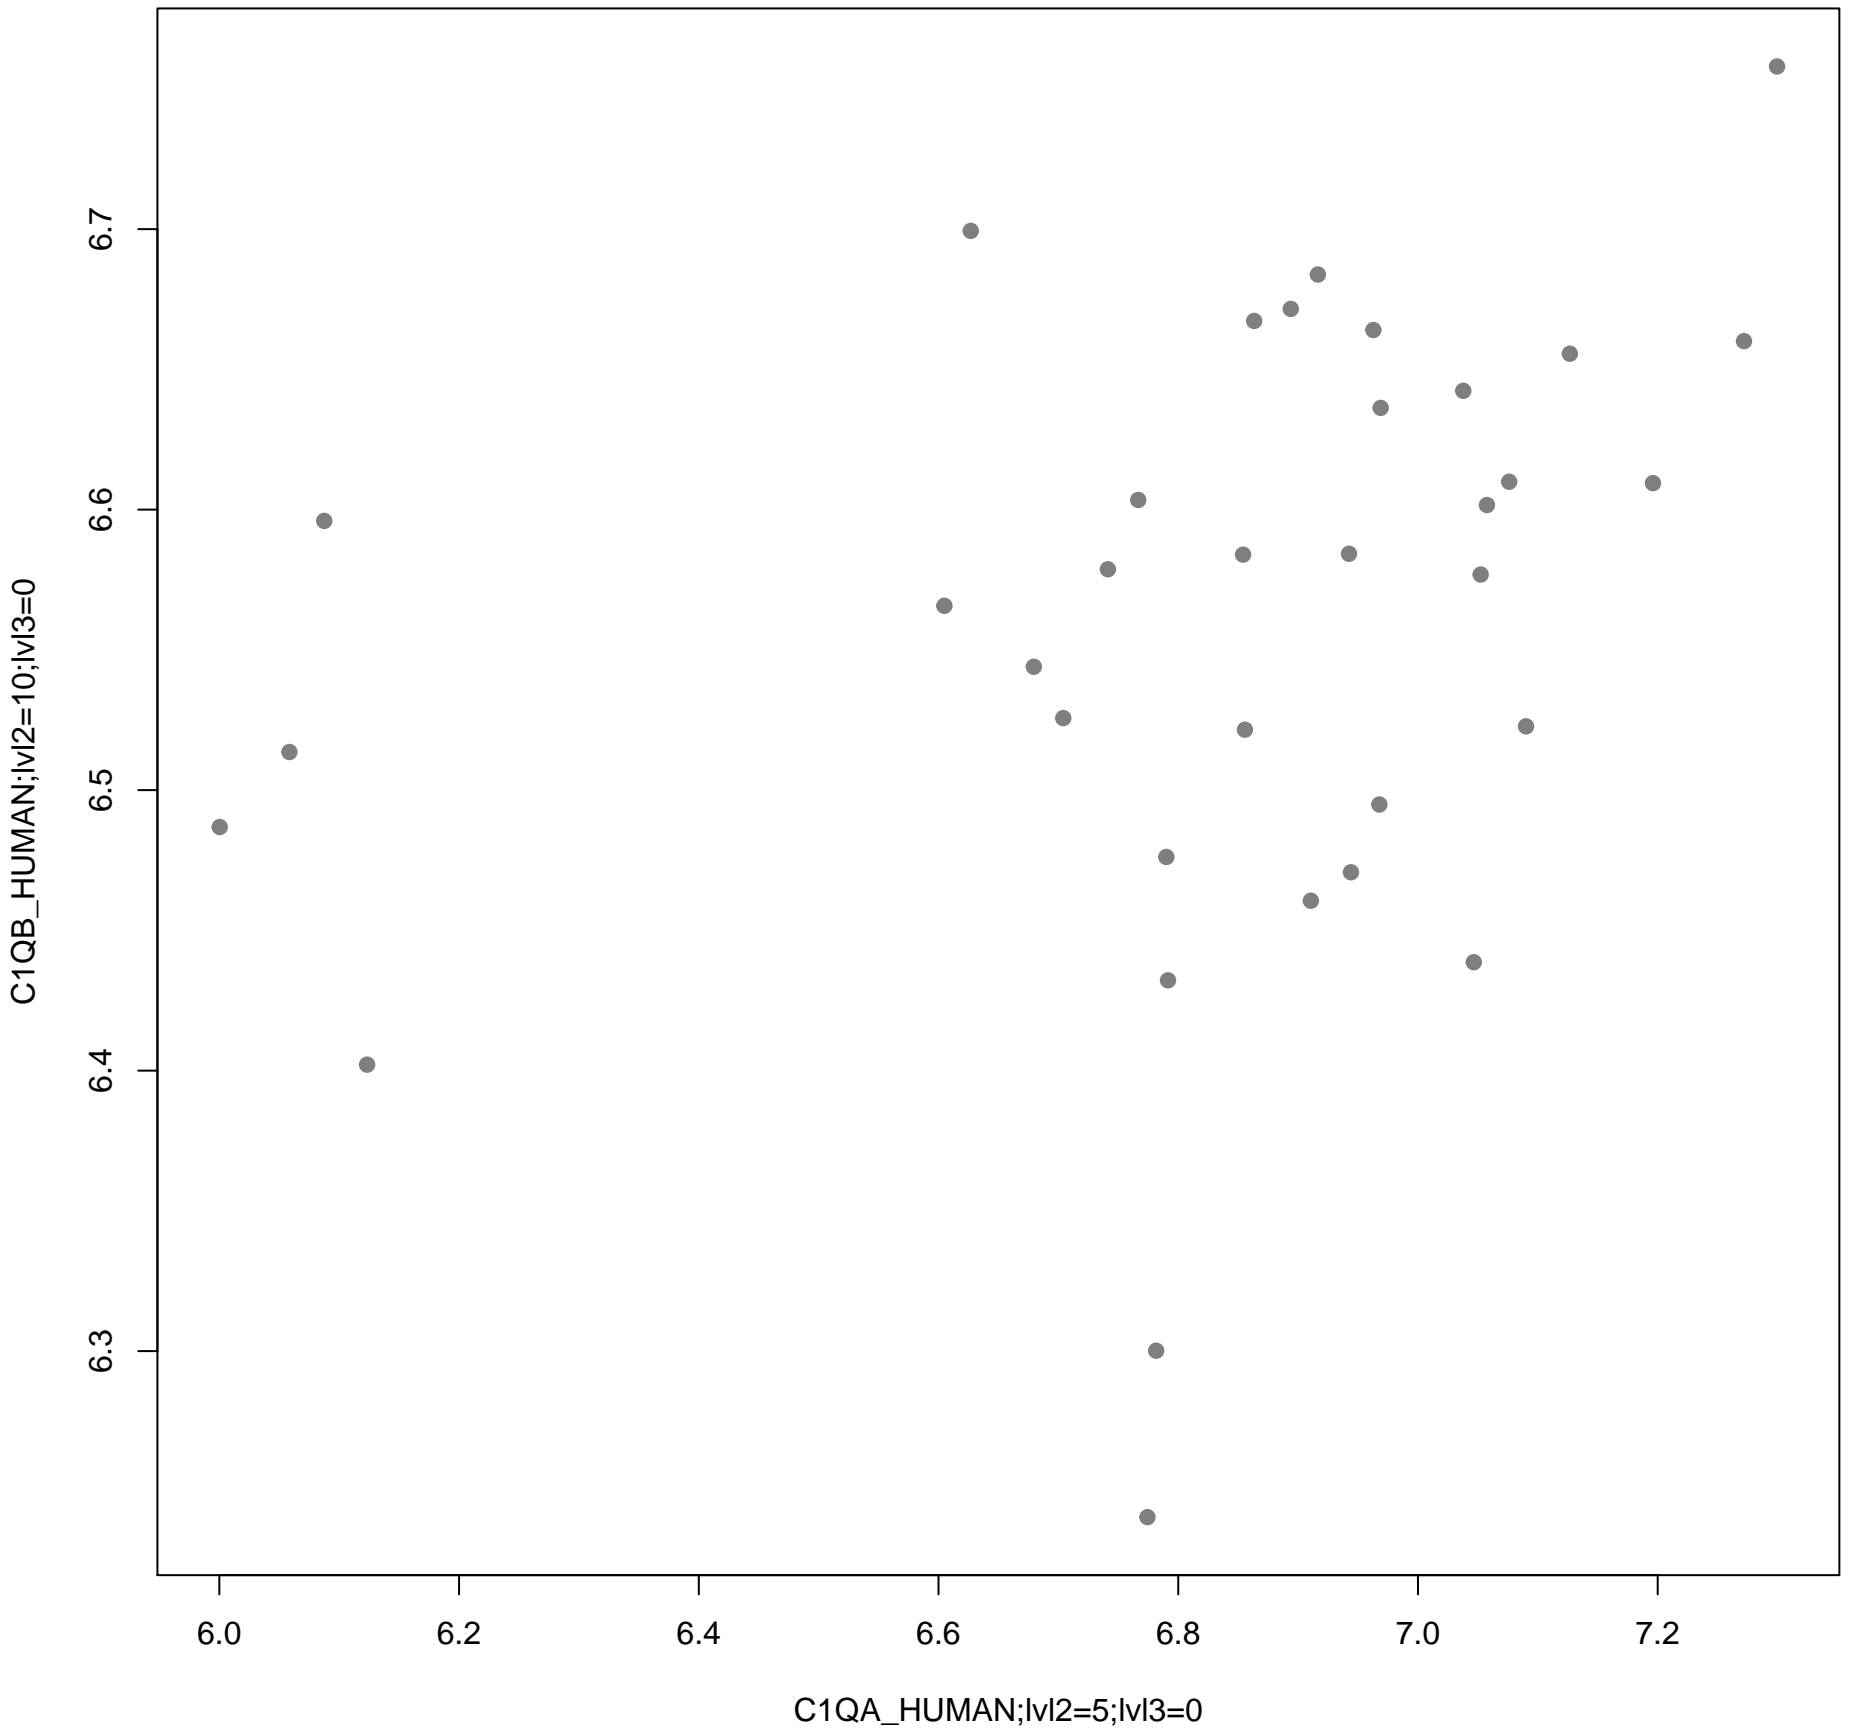

CO4[AB]\_HUMAN subunit A vs B  
cor=0.25; p=0.2

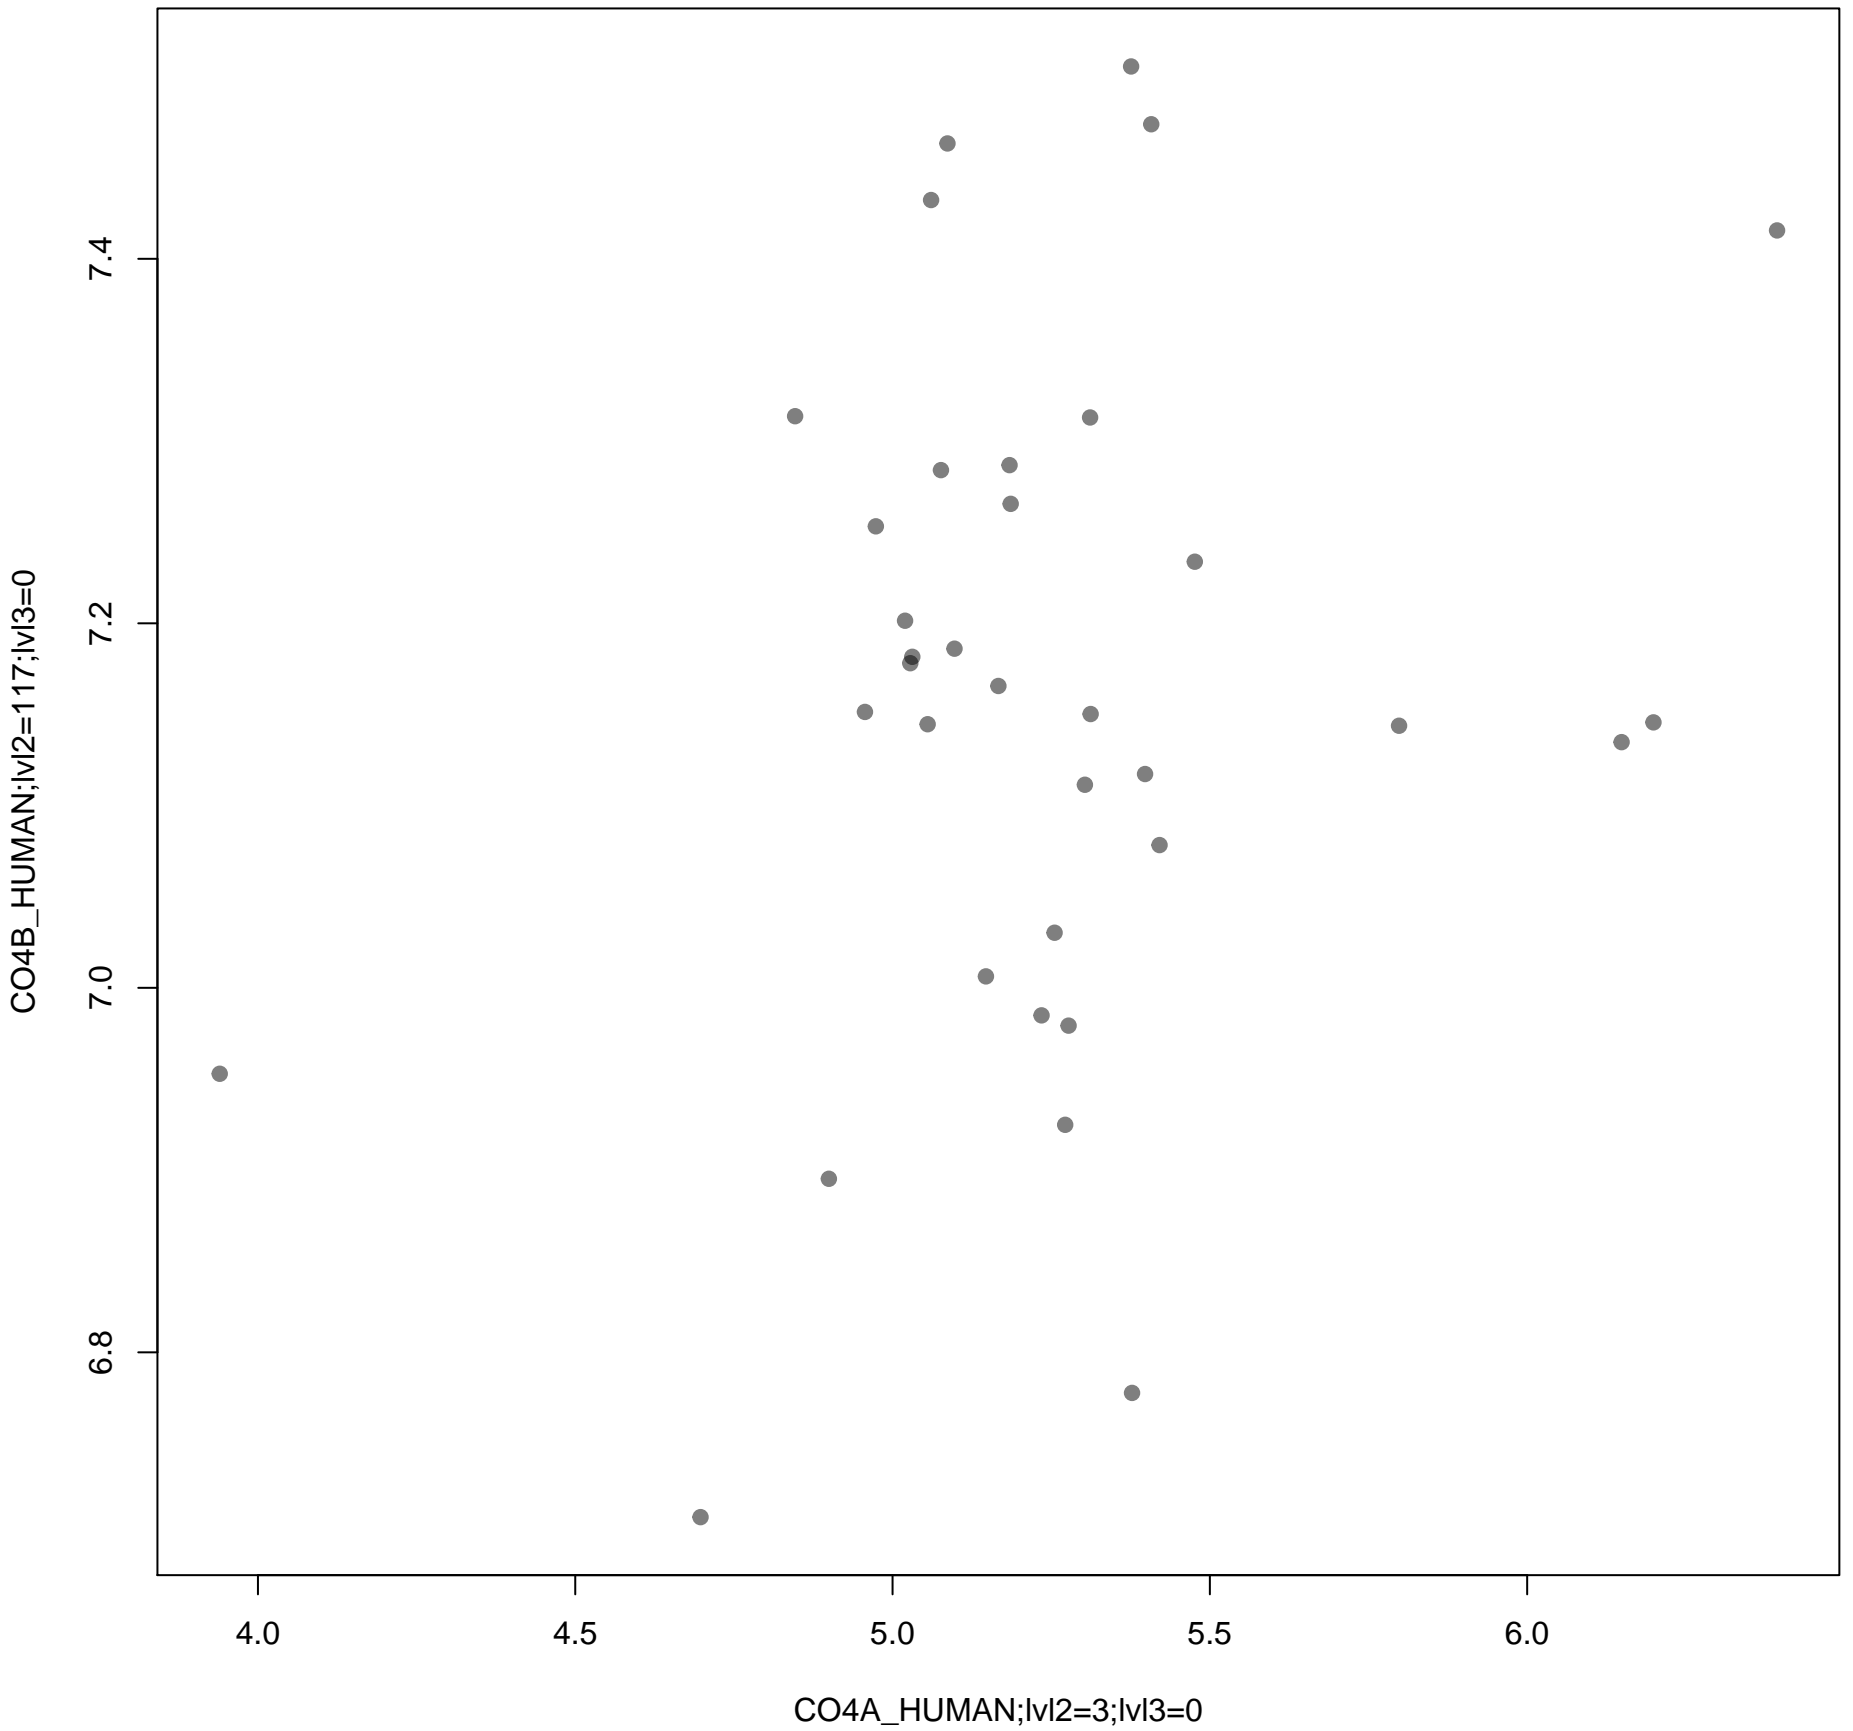



LDH[AB]\_HUMAN subunit A vs B  
cor=0.24; p=0.2

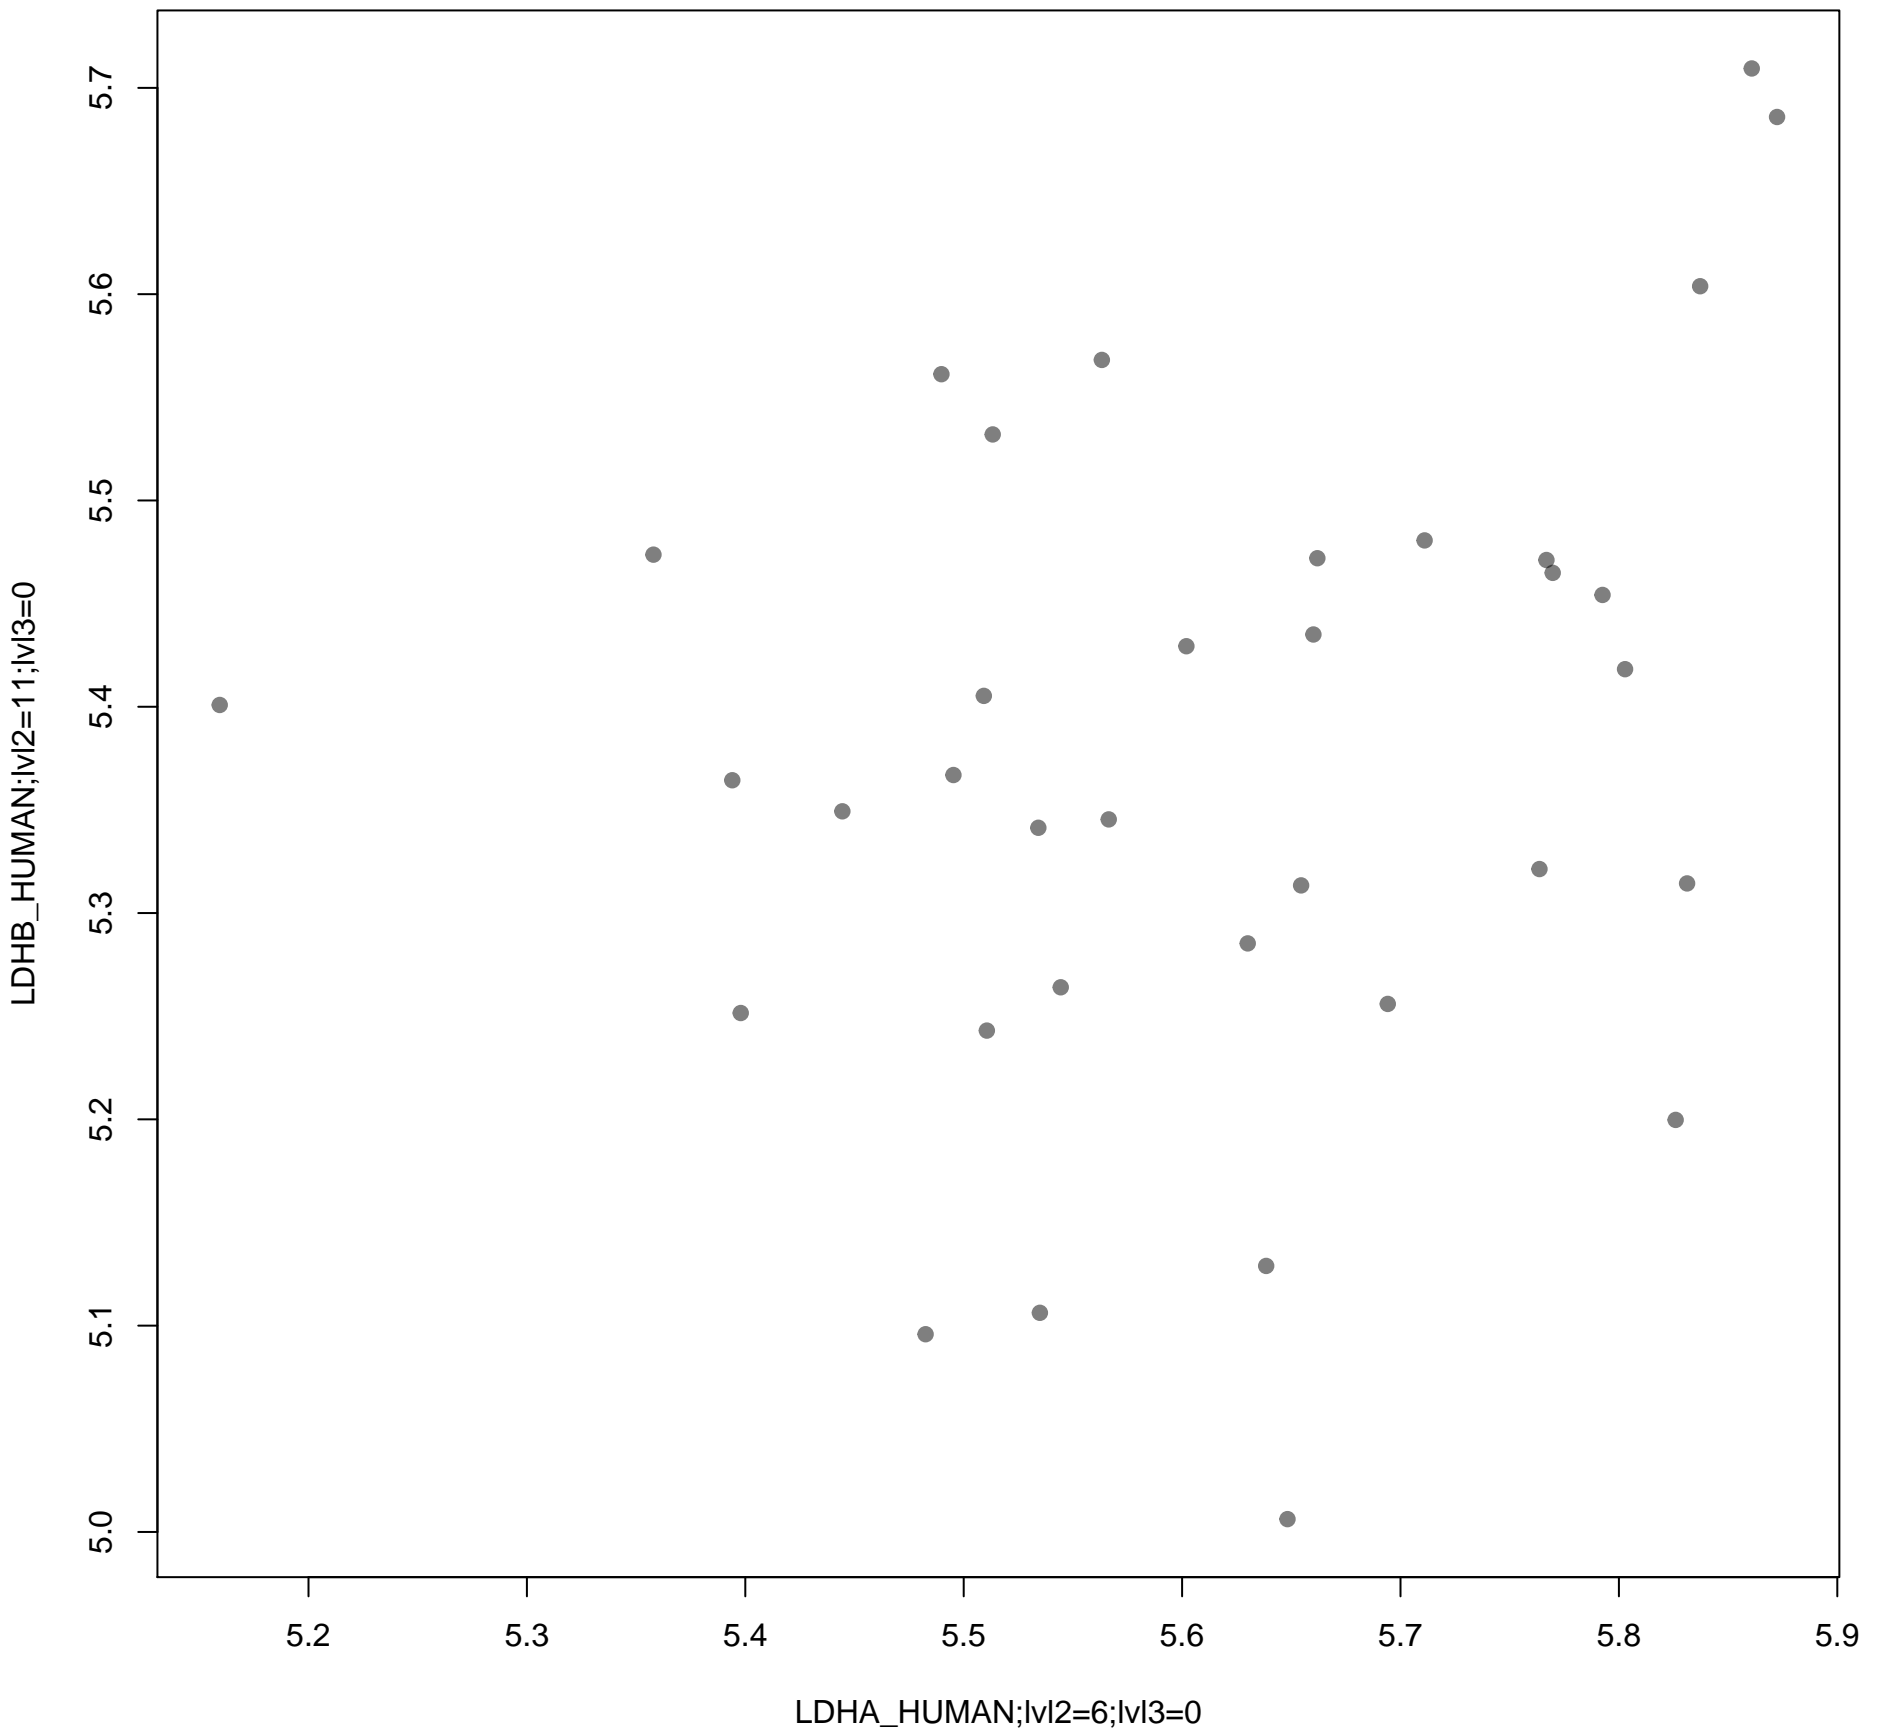

F13[AB]\_HUMAN subunit A vs B  
cor=0.0015; p=1

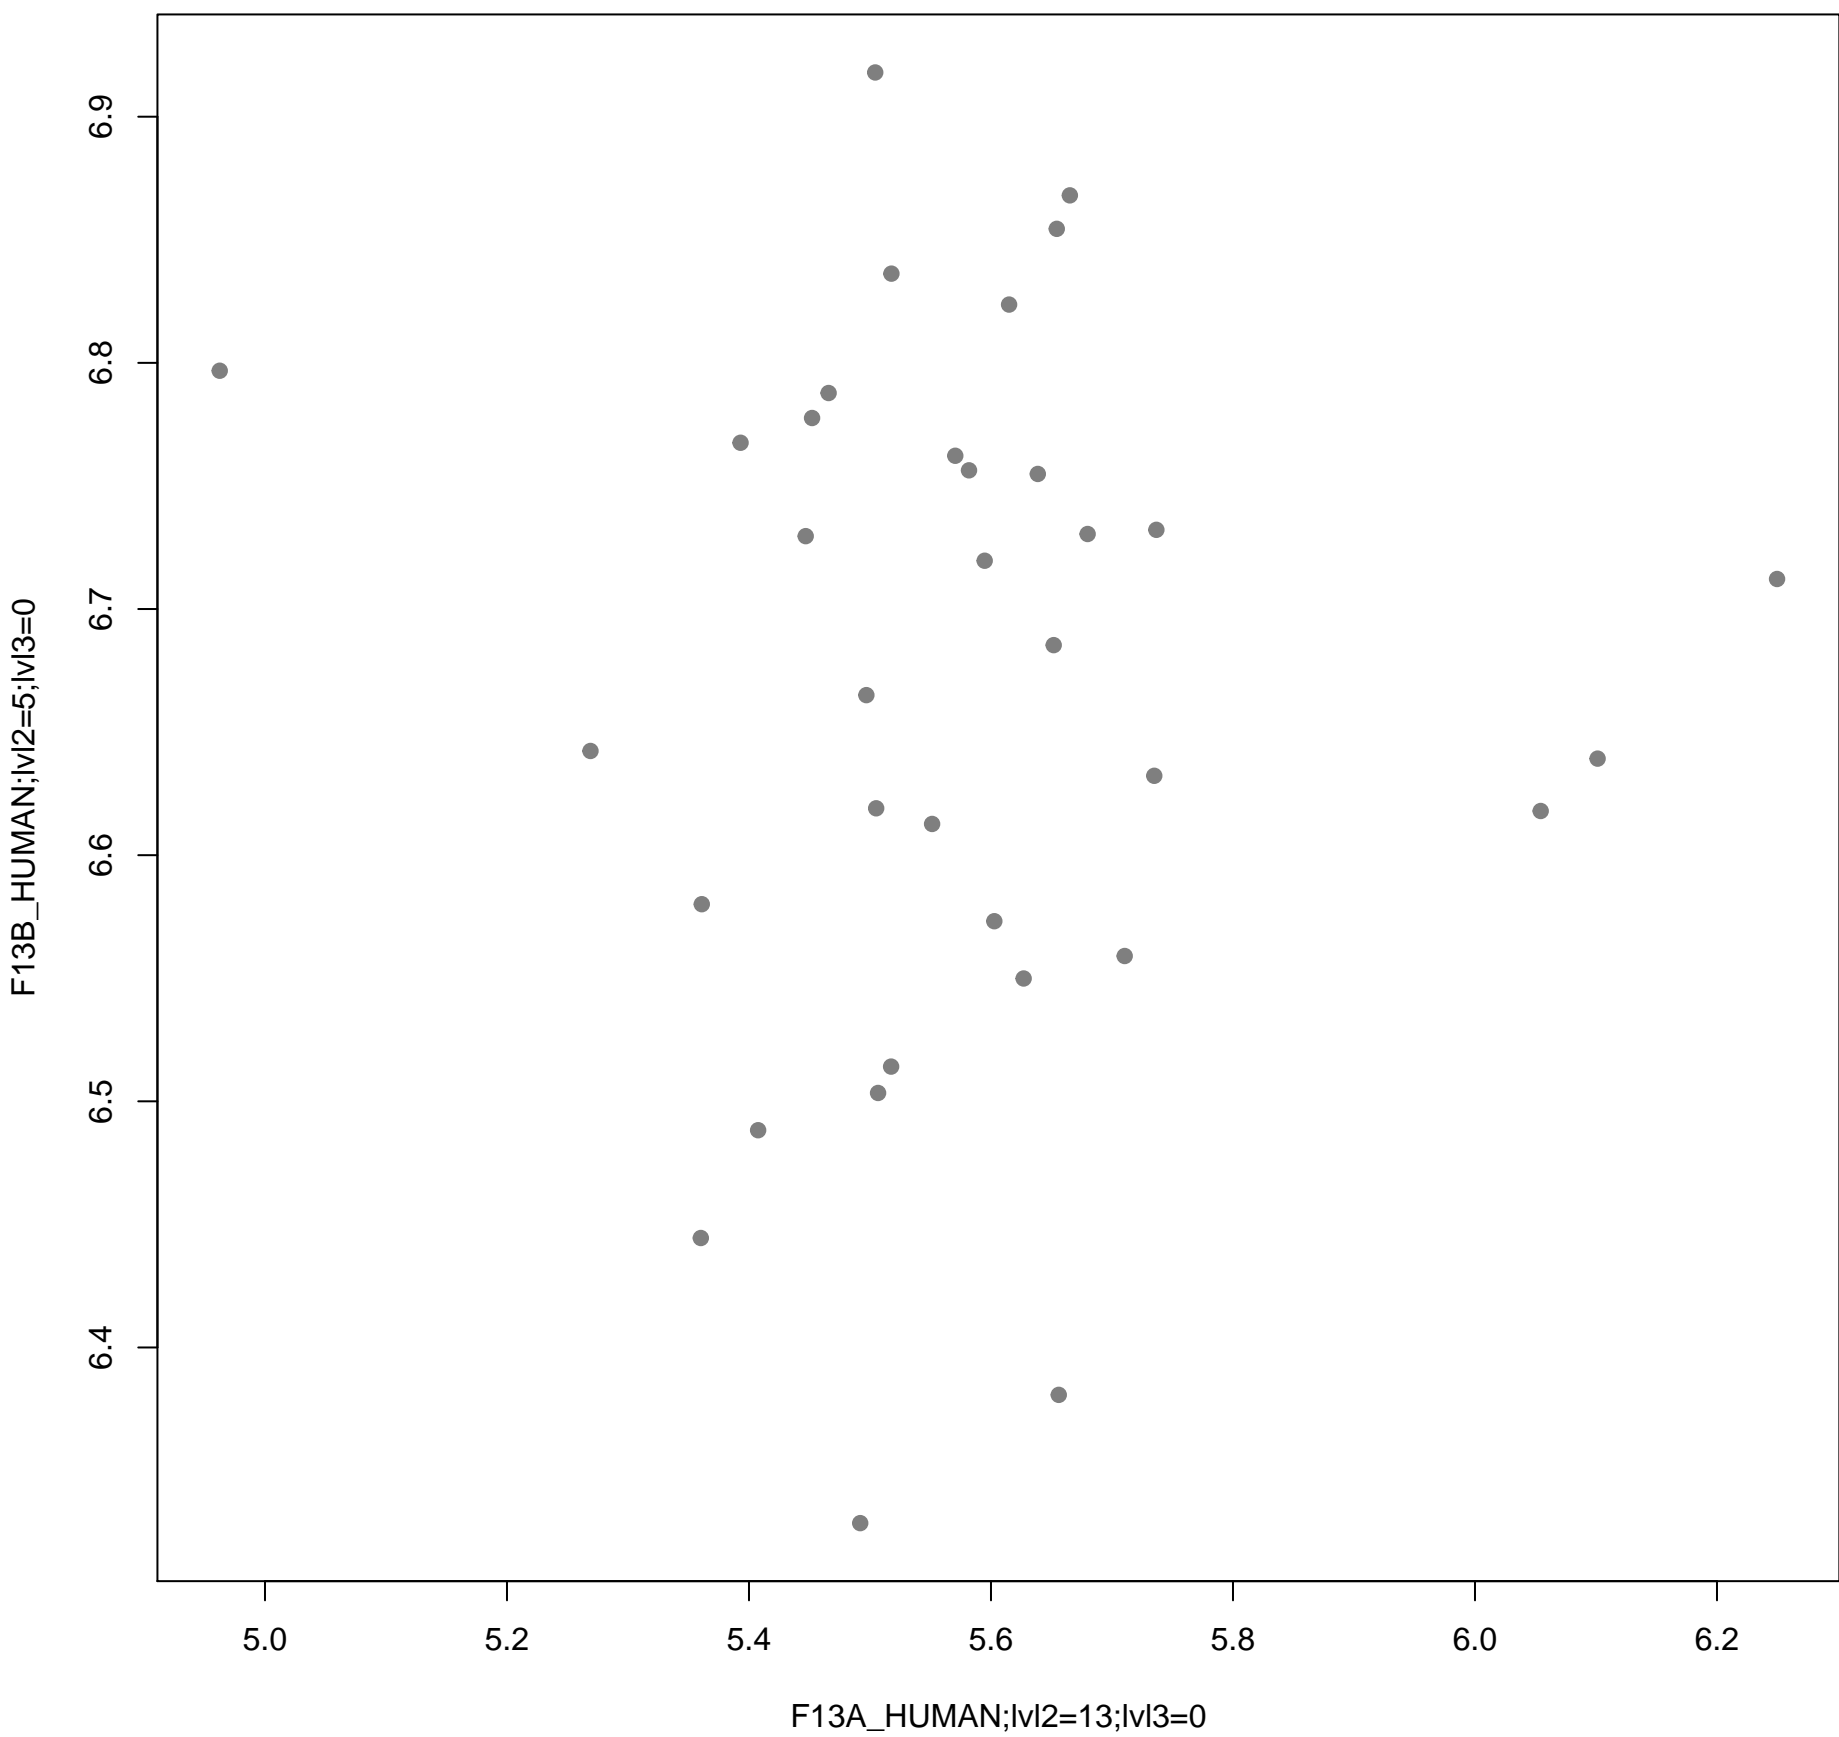

ALDO[AB]\_HUMAN subunit A vs B  
cor=-0.12; p=0.5

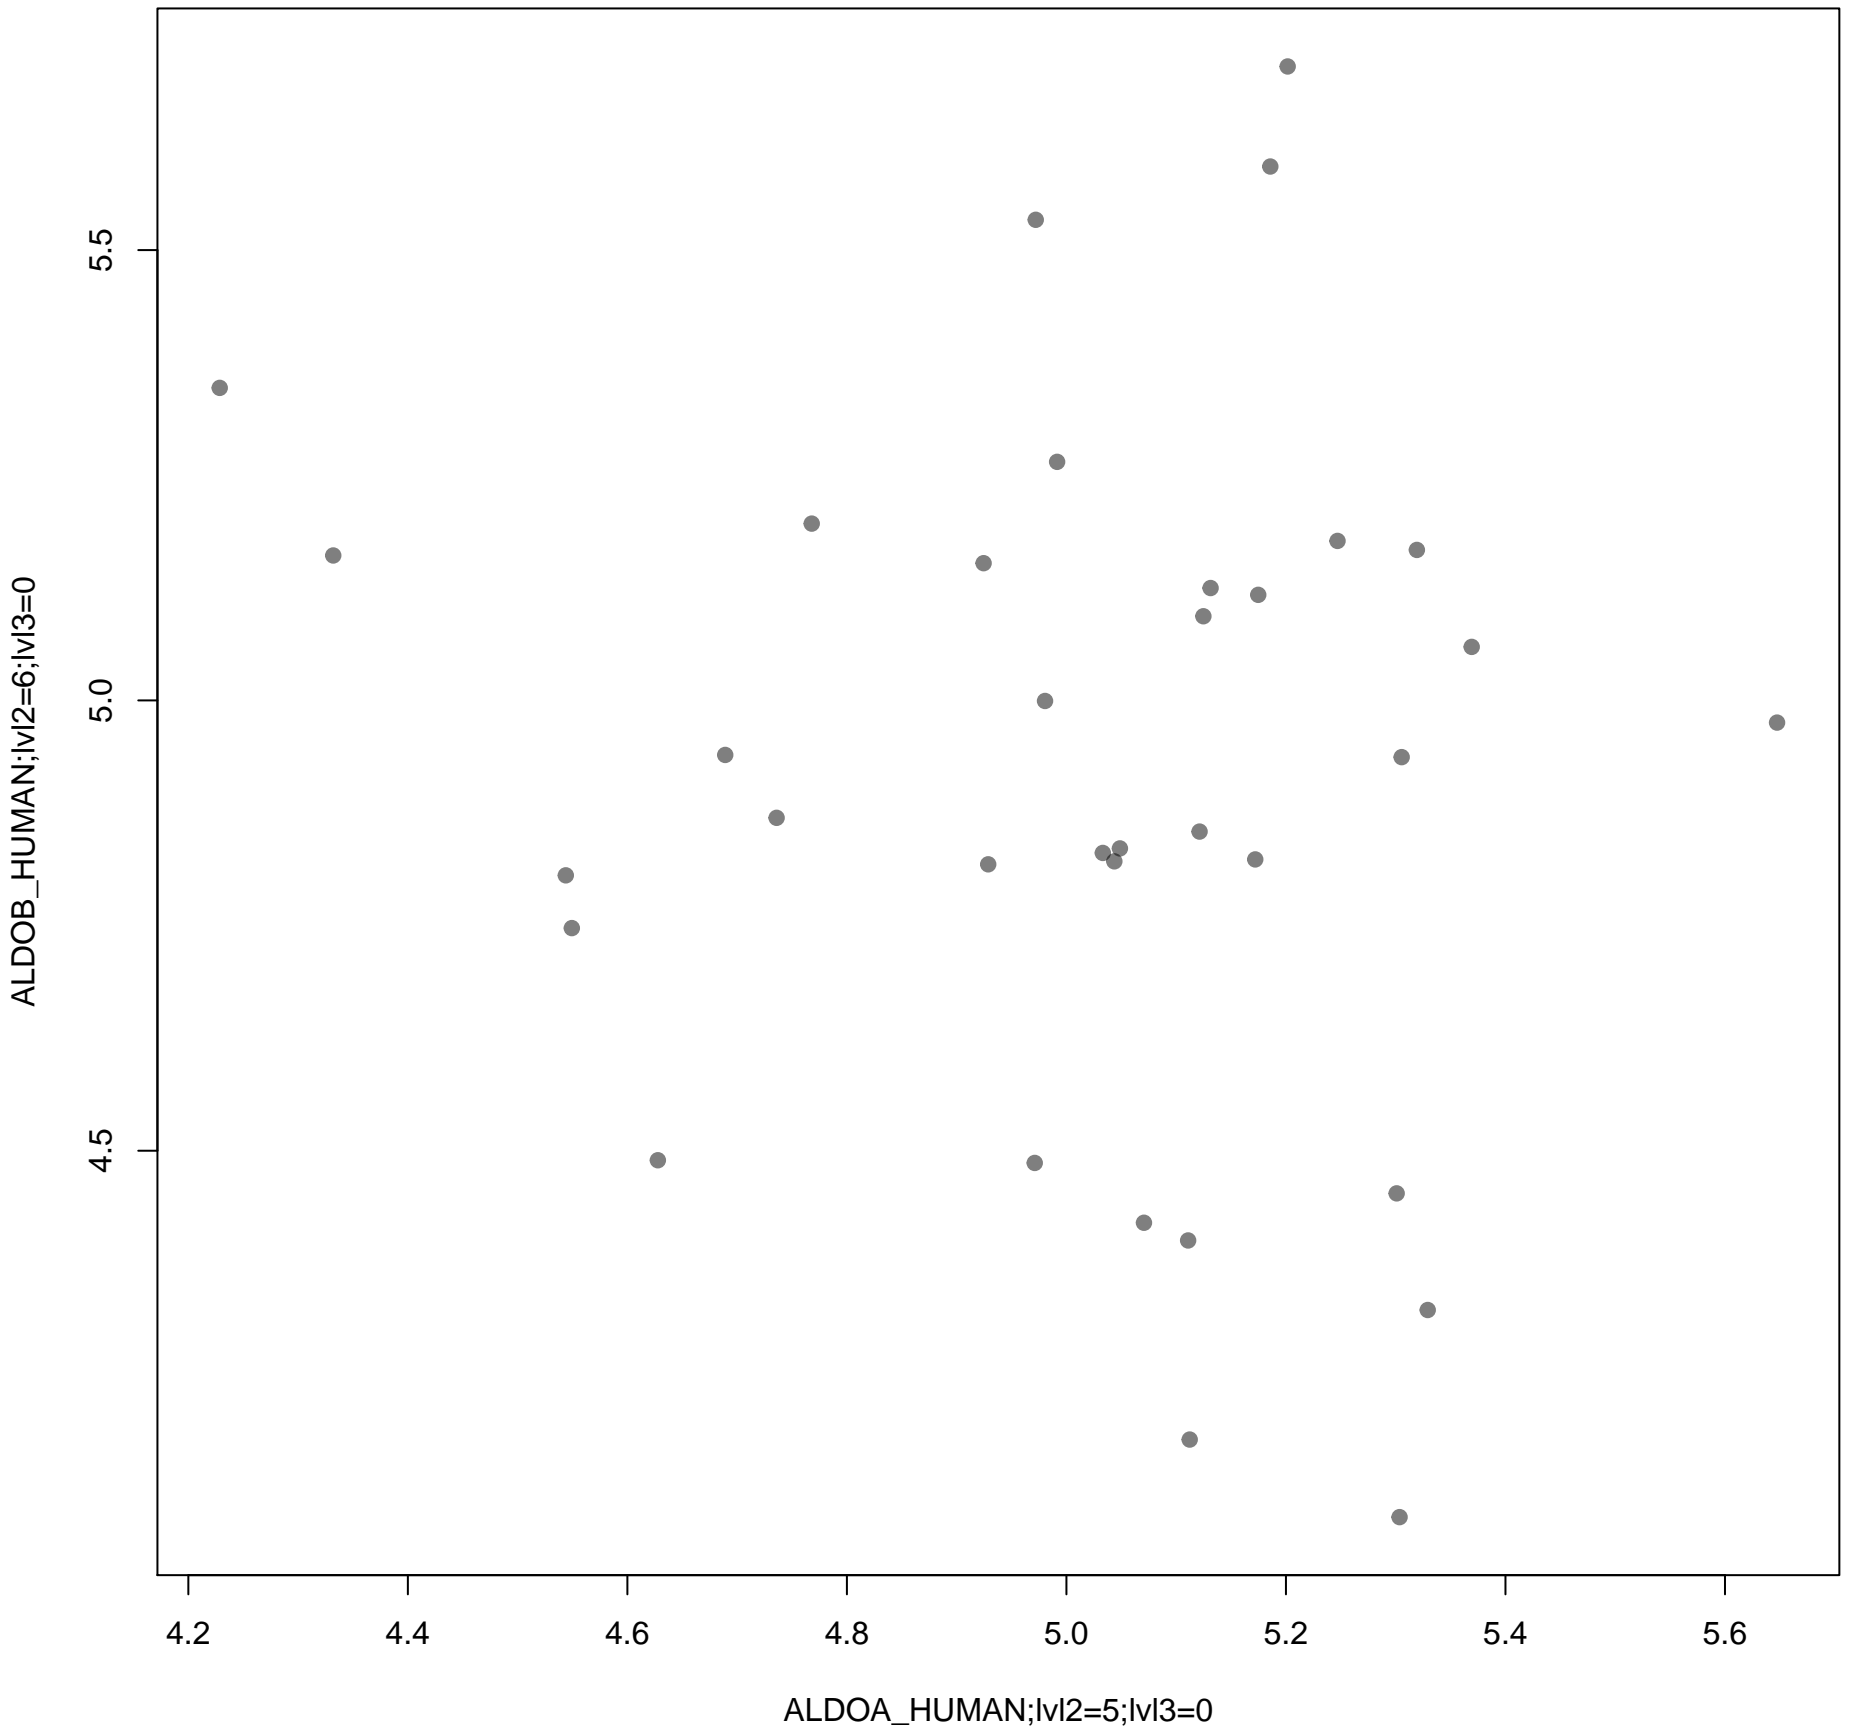

Supplement: pone.0276766.s003.pdf [file pone.0276766.s003.pdf]
